# Supplementary material for: Uremic toxin indoxyl sulfate induces trained immunity via the AhR-dependent arachidonic acid pathway in end-stage renal disease (ESRD)
Source: eLife journal article supplement (doi:10.7554/elife.87316), 2023-06-06
Supplement: fig4-data2 [file elife-87316-fig4-data2-v1.pdf]

Figure 4A, western blotting data

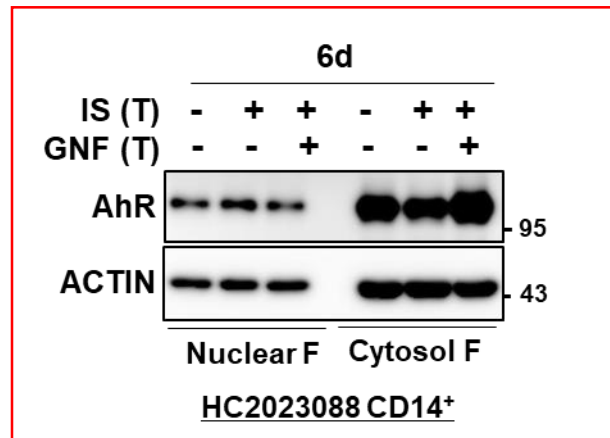

Figure 4A, left panel

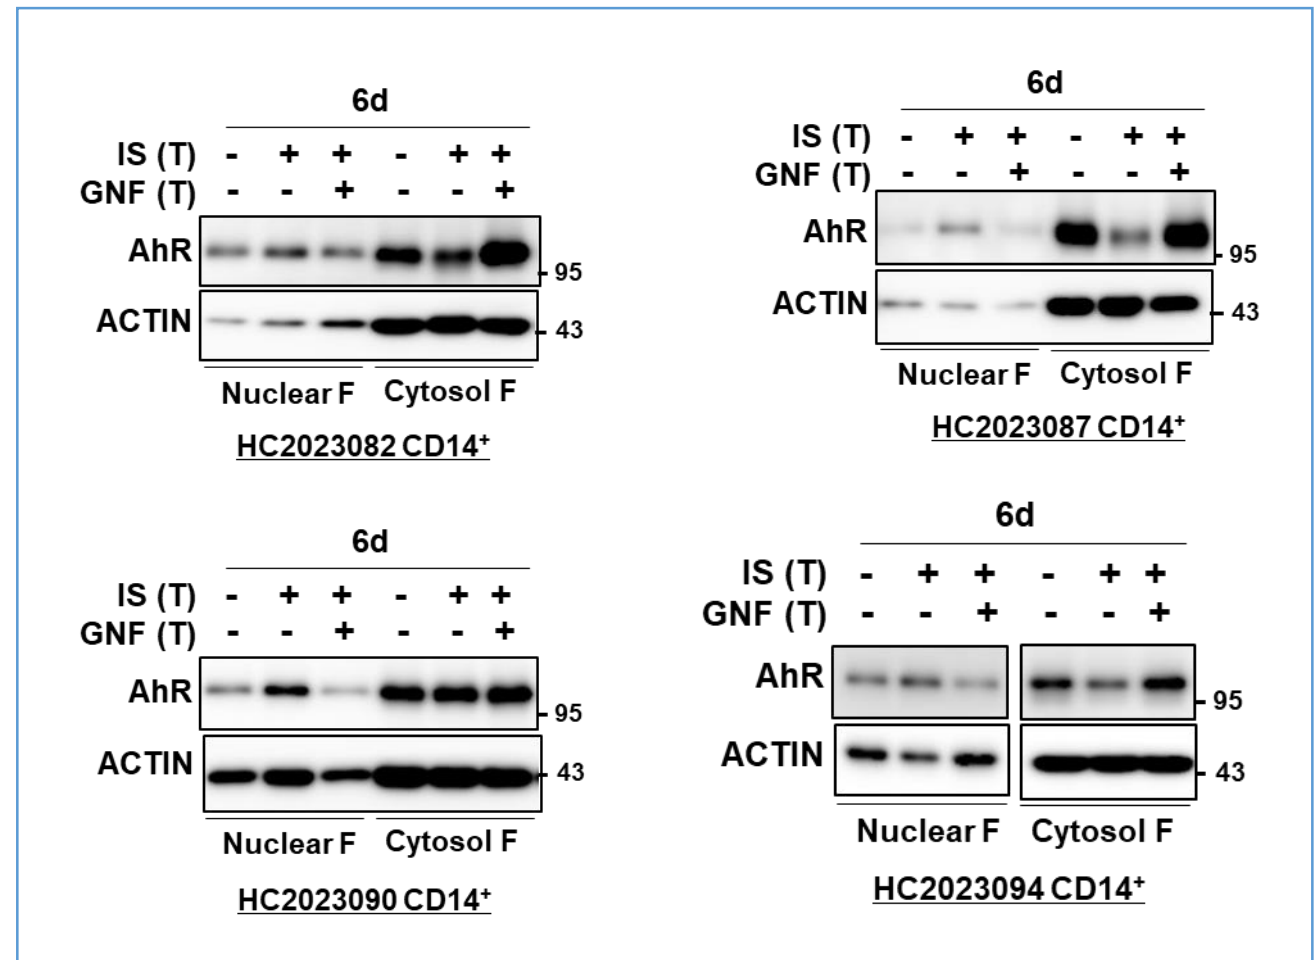

Figure 4A, right graph

Figure 4A, western blotting data

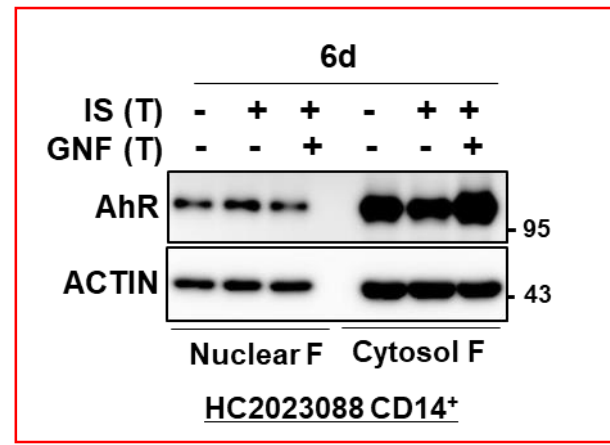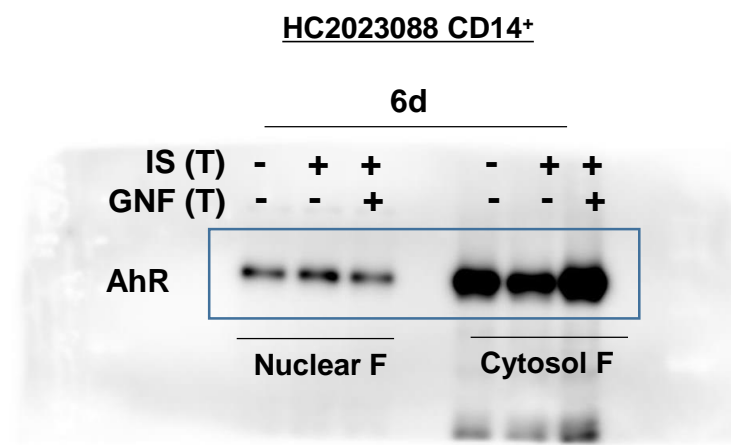

→ File name: AhR\_HC2023088. jpg

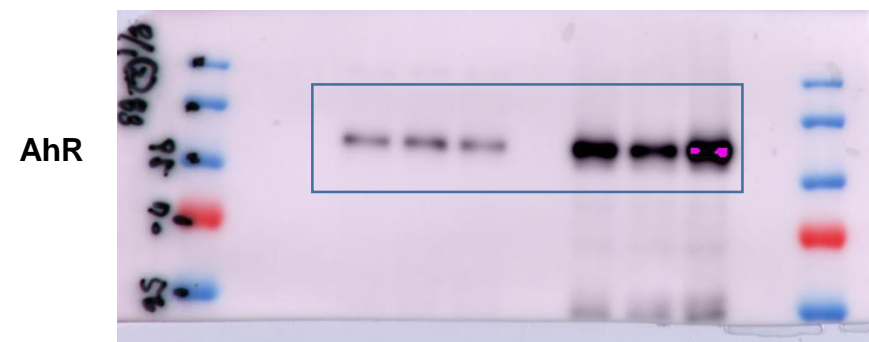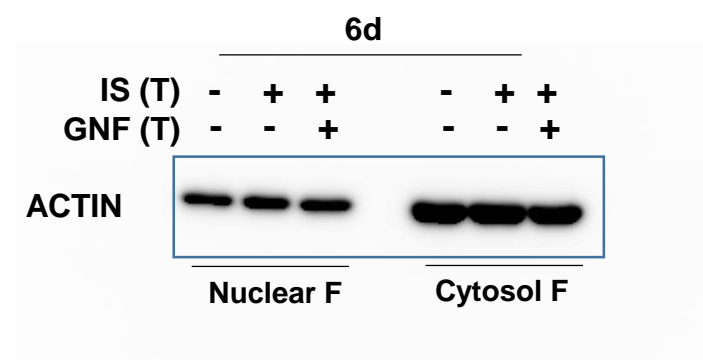

→ File name: Actin\_HC2023088. jpg

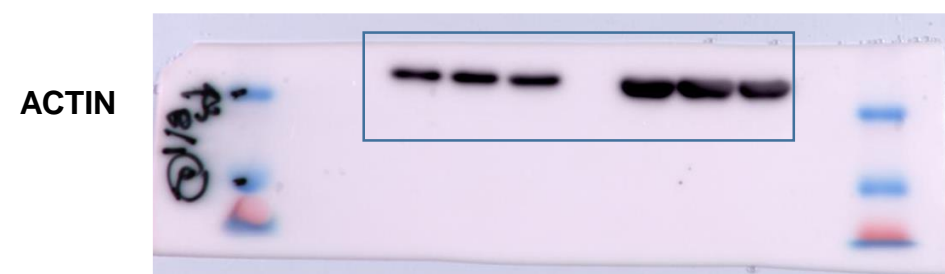

Figure 4A, western blotting data

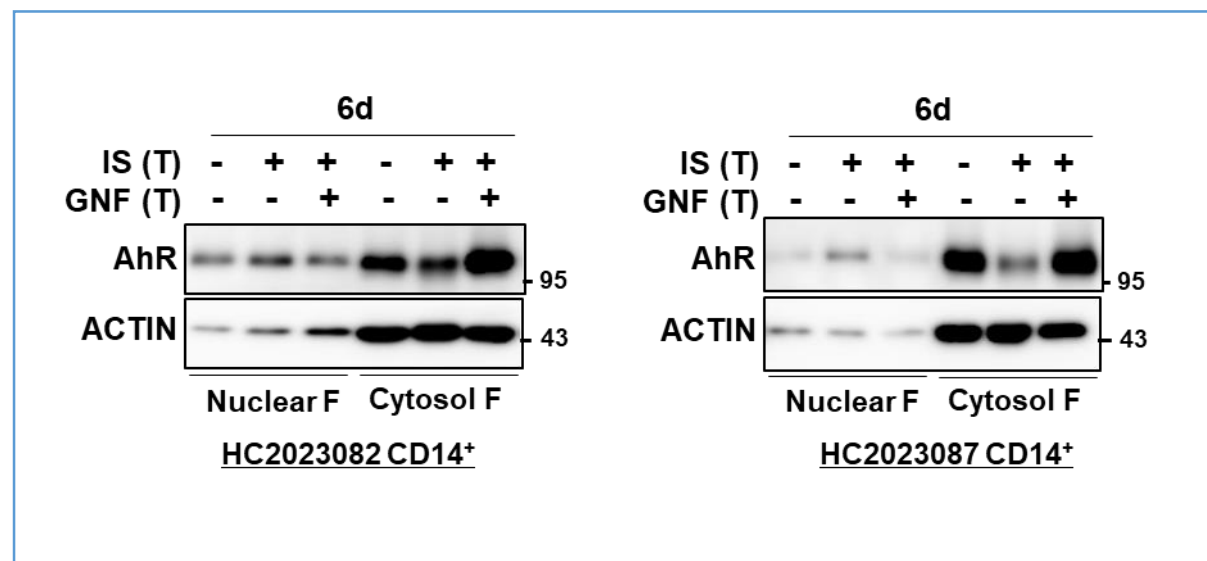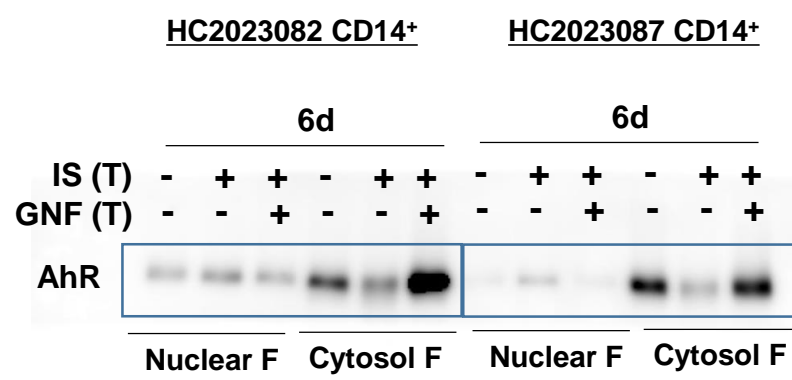

→ File name: AhR\_HC2023082 87 90.jpg

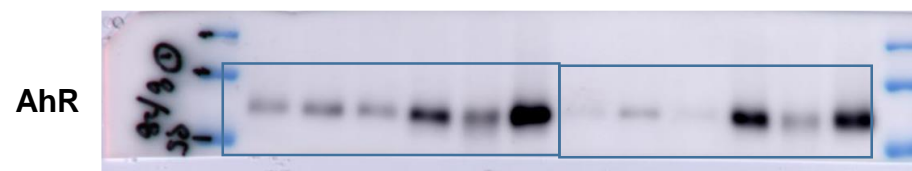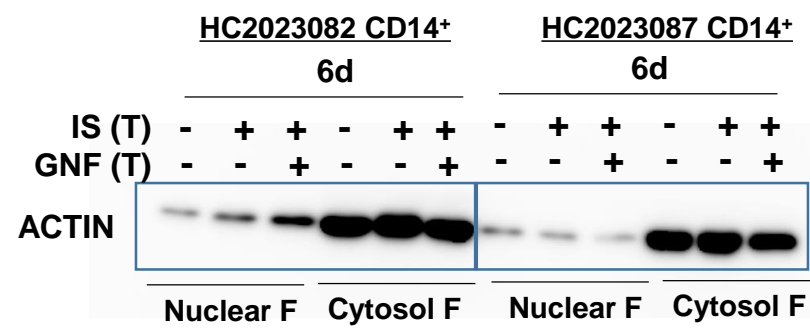

→ File name: Actin\_HC2023082 87 90.jpg

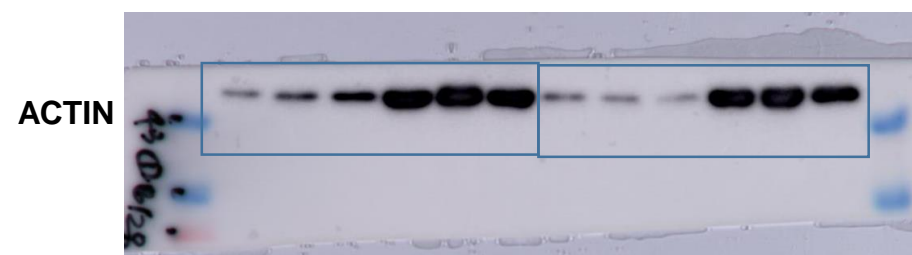

Figure 4A, western blotting data

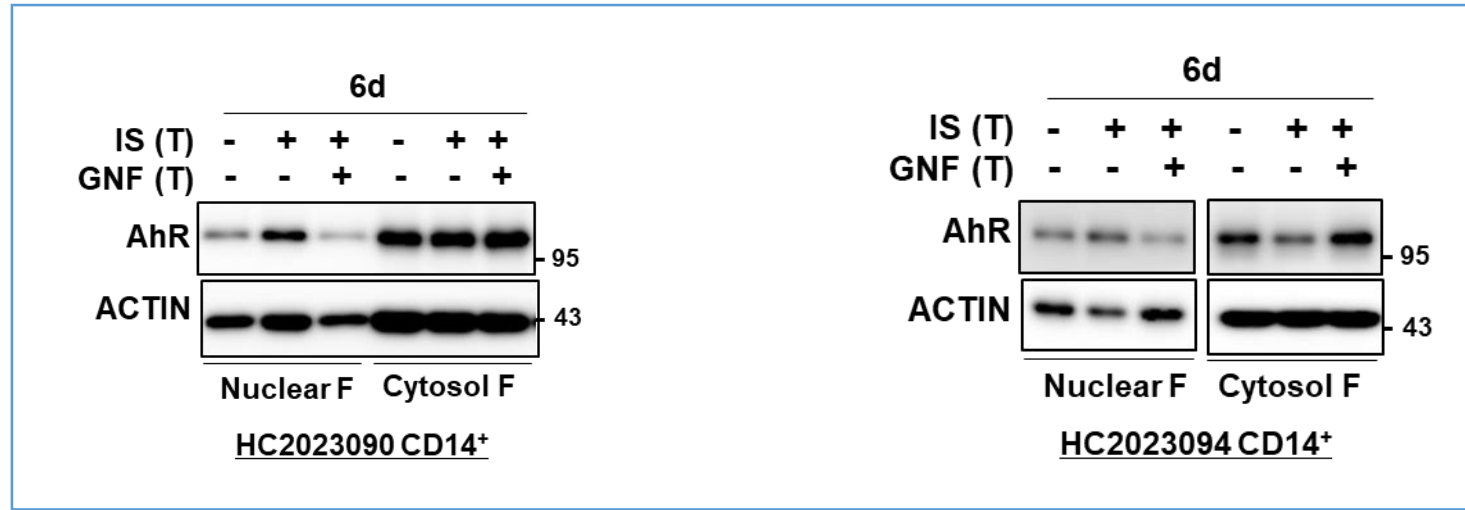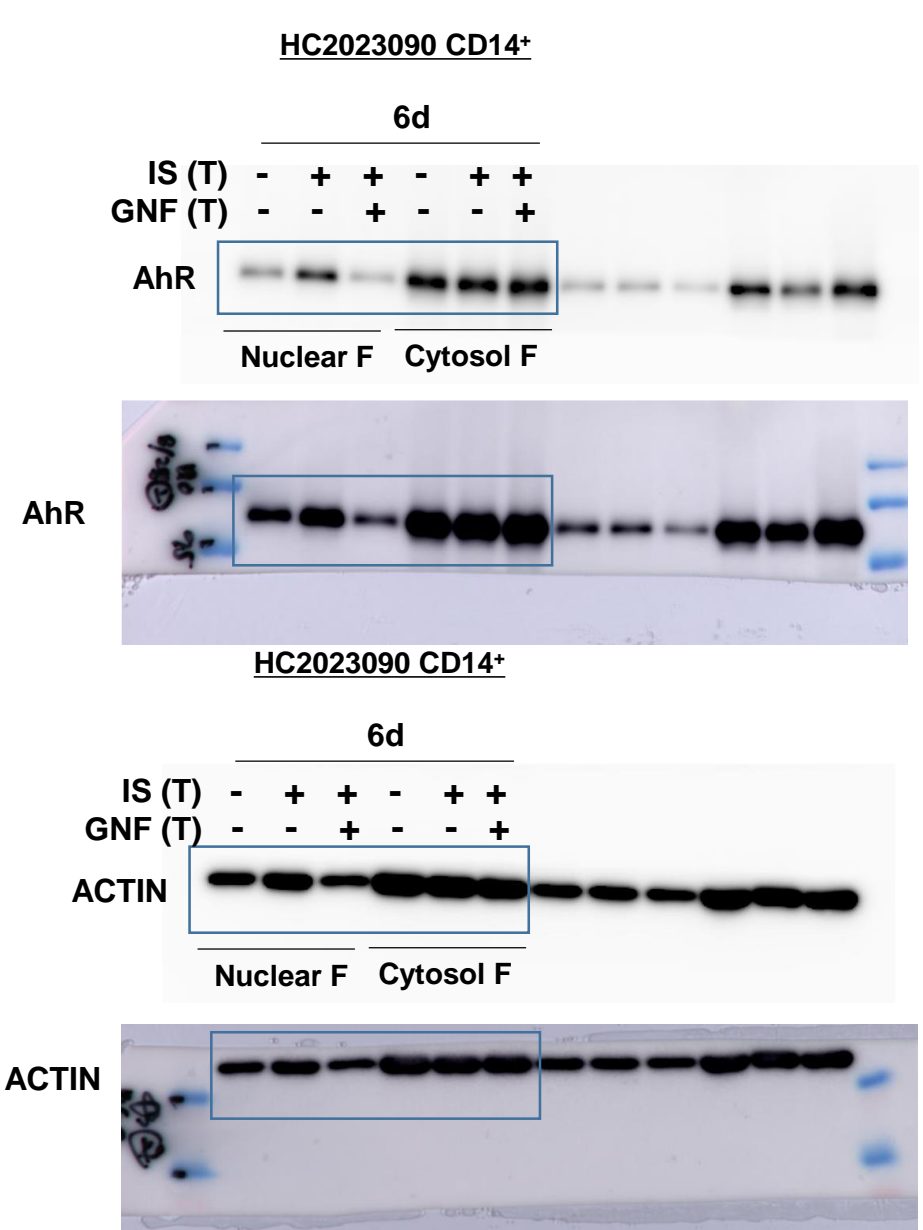

→ File name: AhR\_HC2023082 87 90.jpg  
Actin\_HC2023082 87 90.jpg

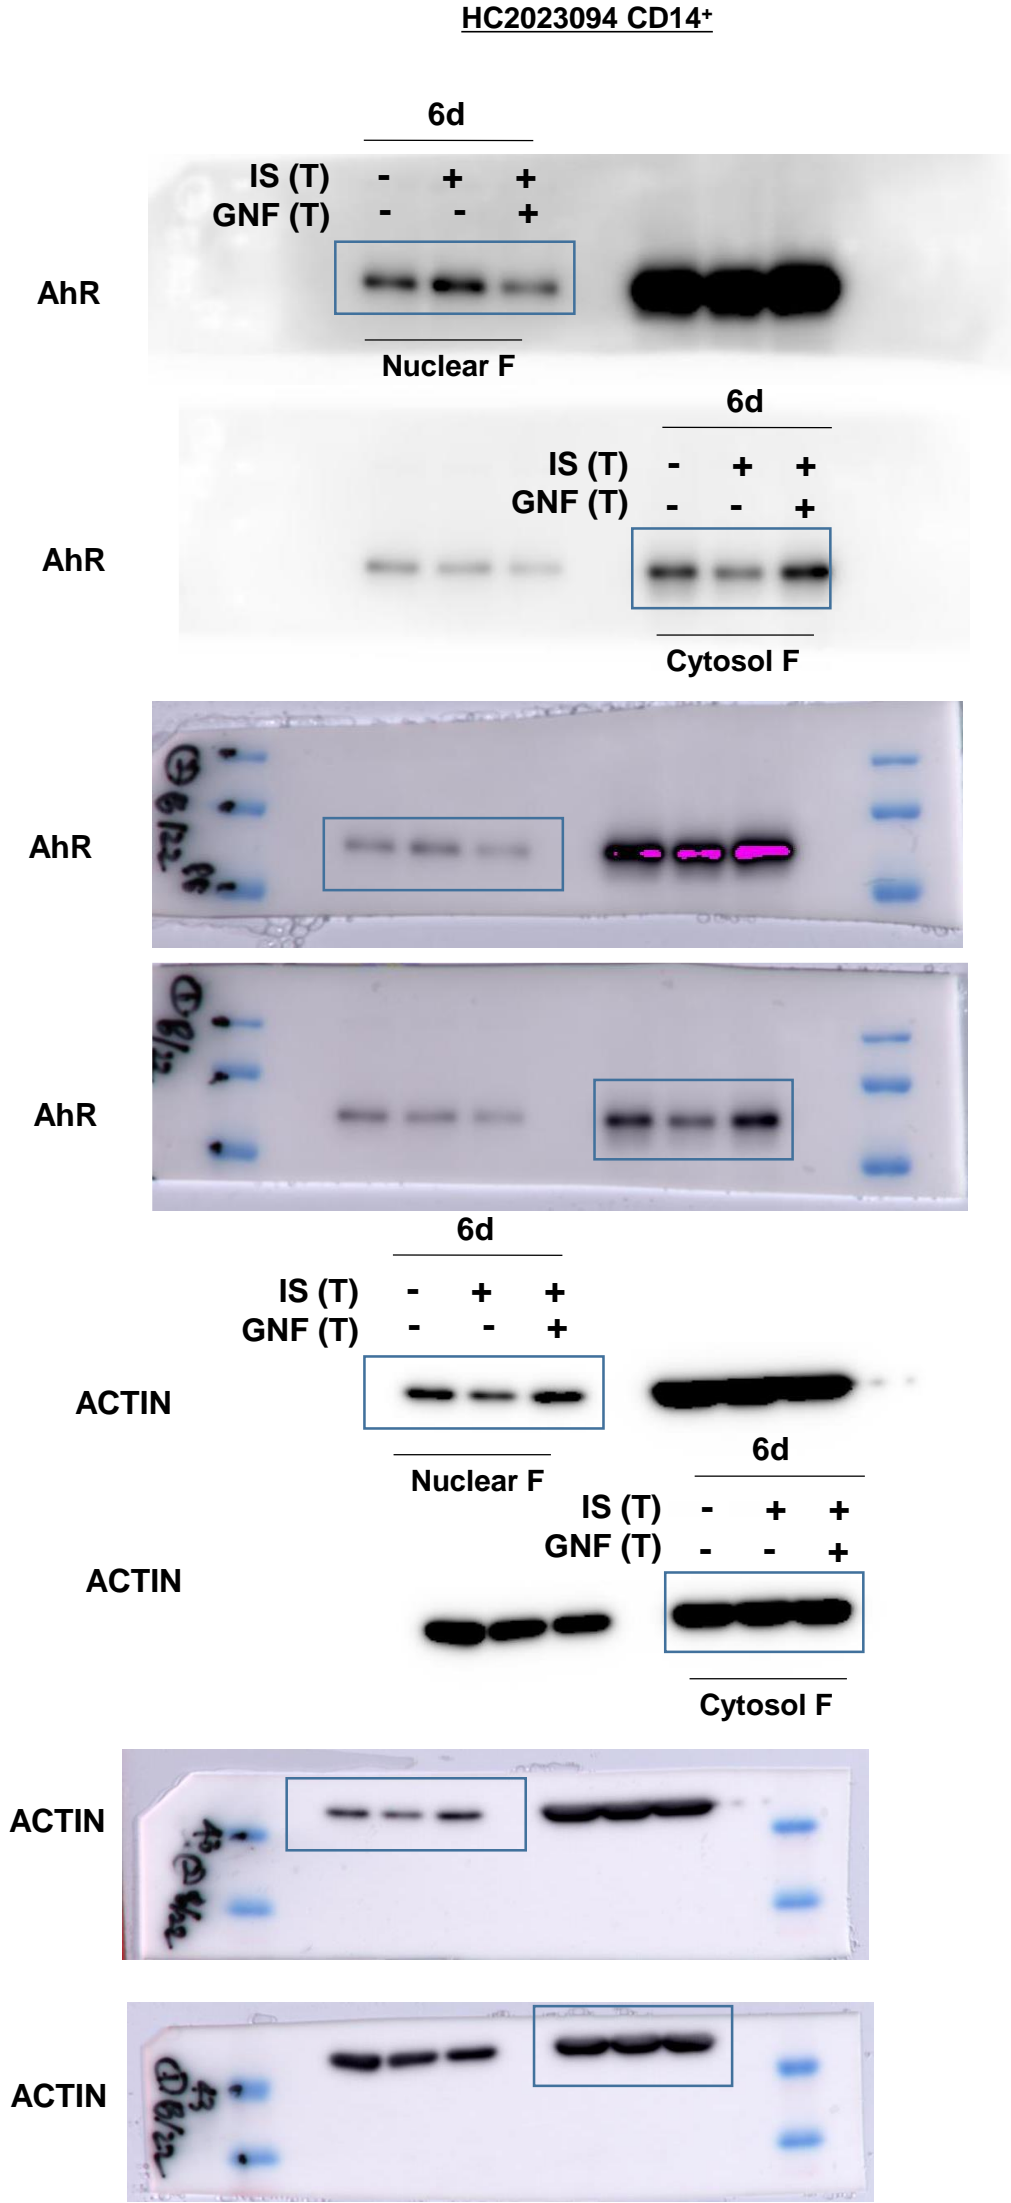

→ File name: AhR\_HC2023094.jpg  
Actin\_HC2023094.jpg
