# Supplementary material for: Uremic toxin indoxyl sulfate induces trained immunity via the AhR-dependent arachidonic acid pathway in end-stage renal disease (ESRD)
Source: eLife journal article supplement (doi:10.7554/elife.87316), 2023-06-06

Figure 4-figure supplement 1D, western blotting data

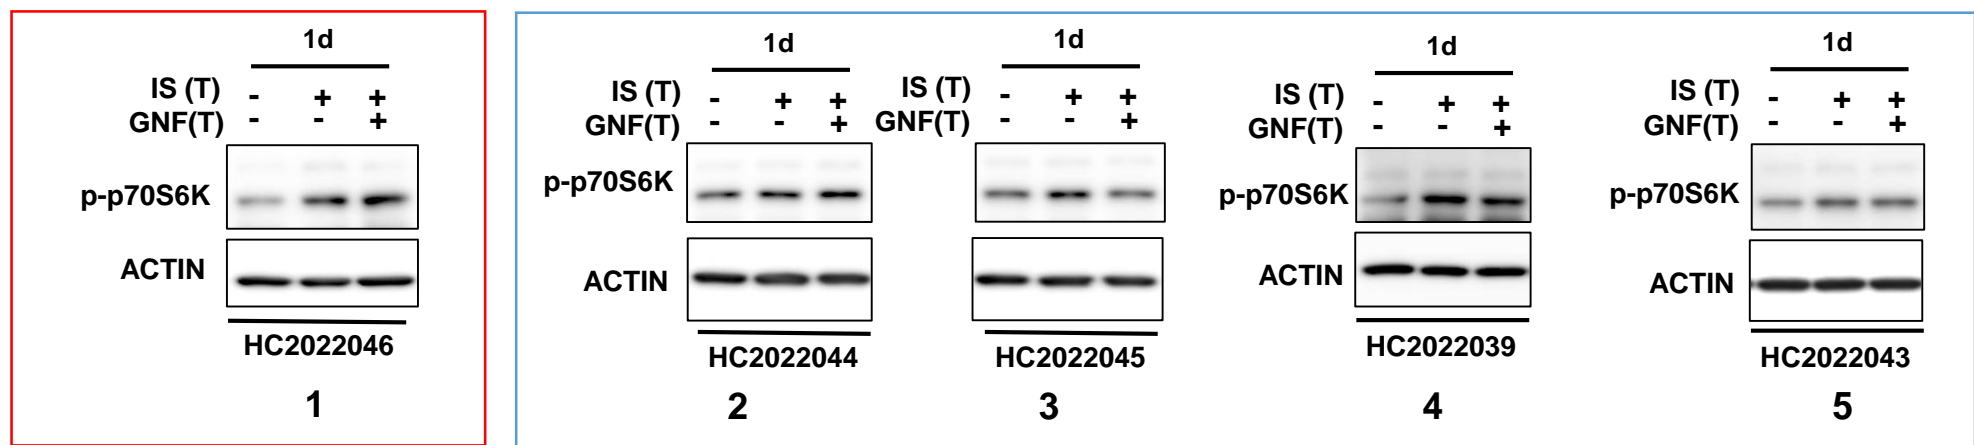

Figure 4-sFig. 1D, left panel

Figure 4-sFig. 1D, right graph

File name: pS6K\_HC2022039.jpg ←  
Actin\_HC2022039.jpg

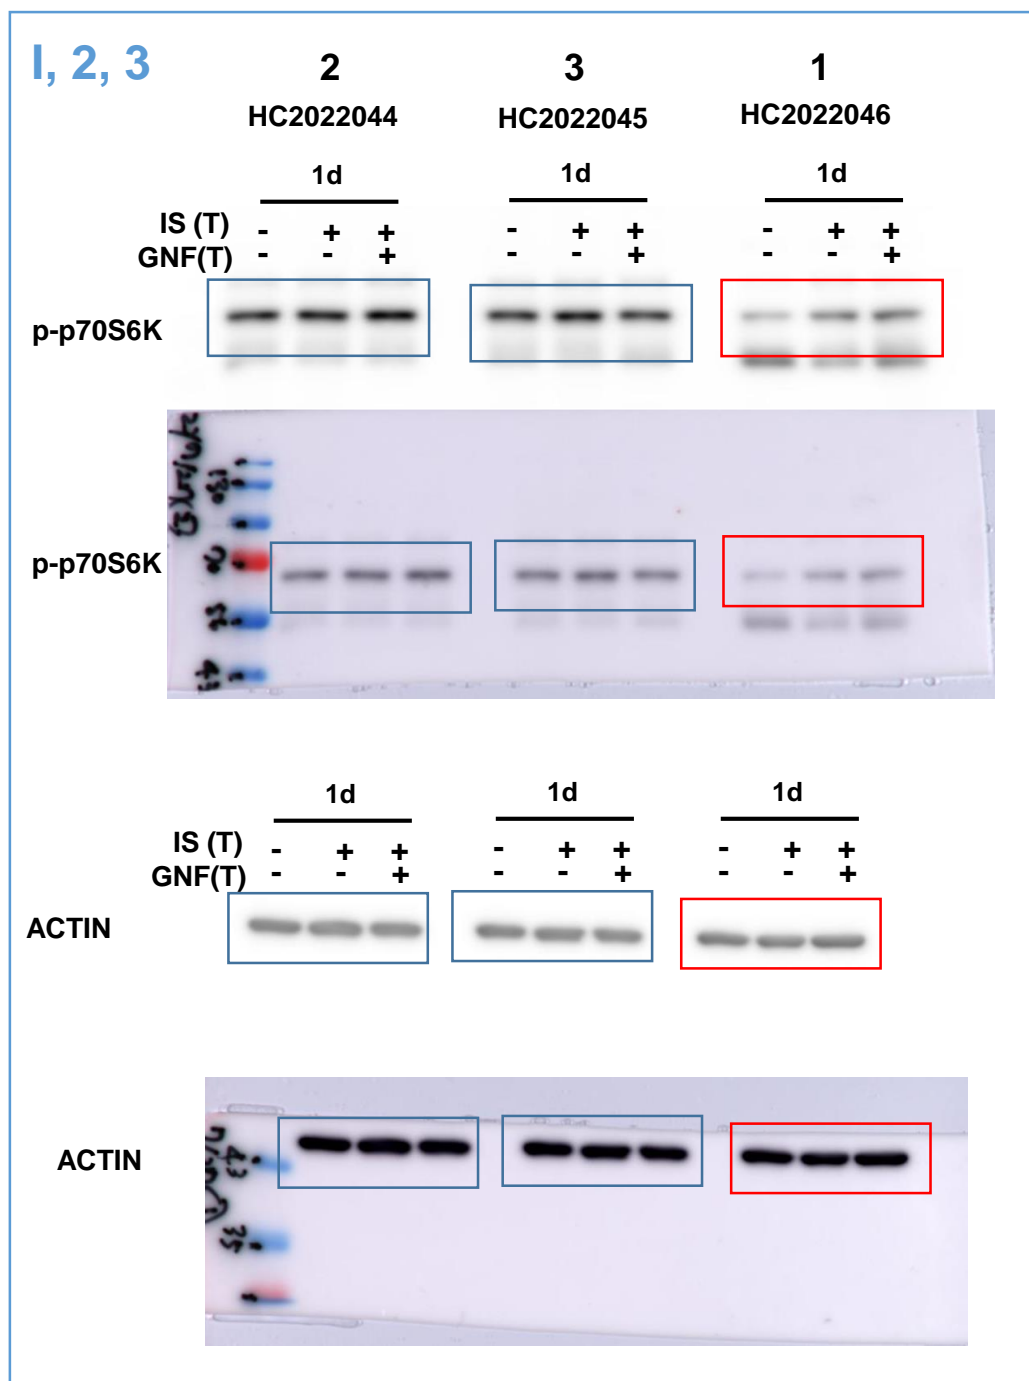

→ File name: pS6K\_HC2022044 45 46.jpg  
Actin\_HC2022044 45 46.jpg

File name: pS6K\_HC2022043.jpg ←  
Actin\_HC2022043.jpg

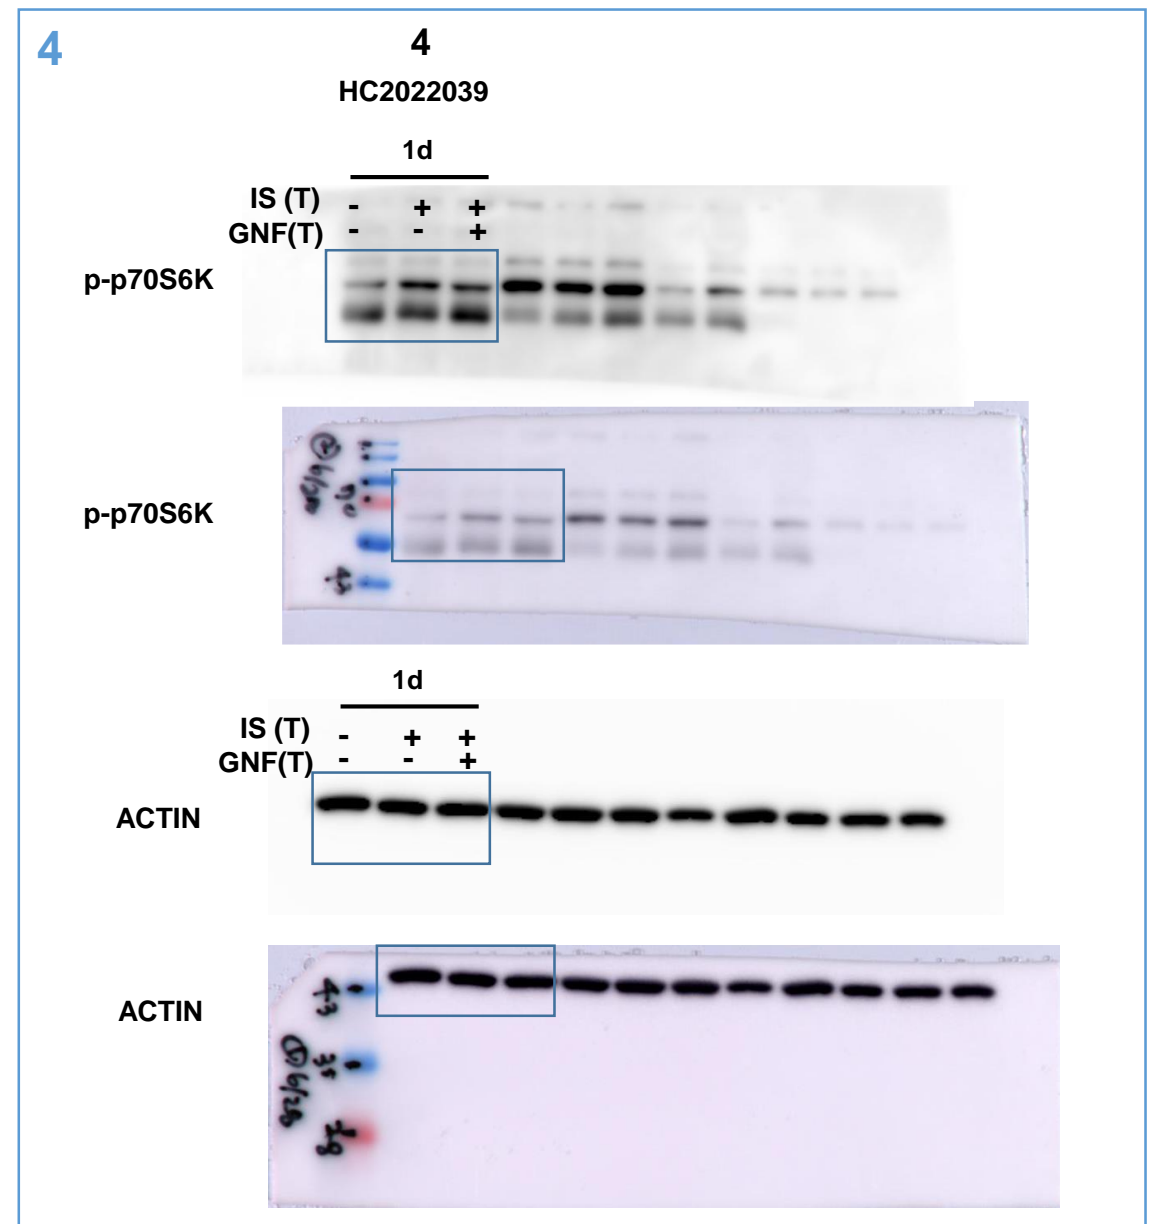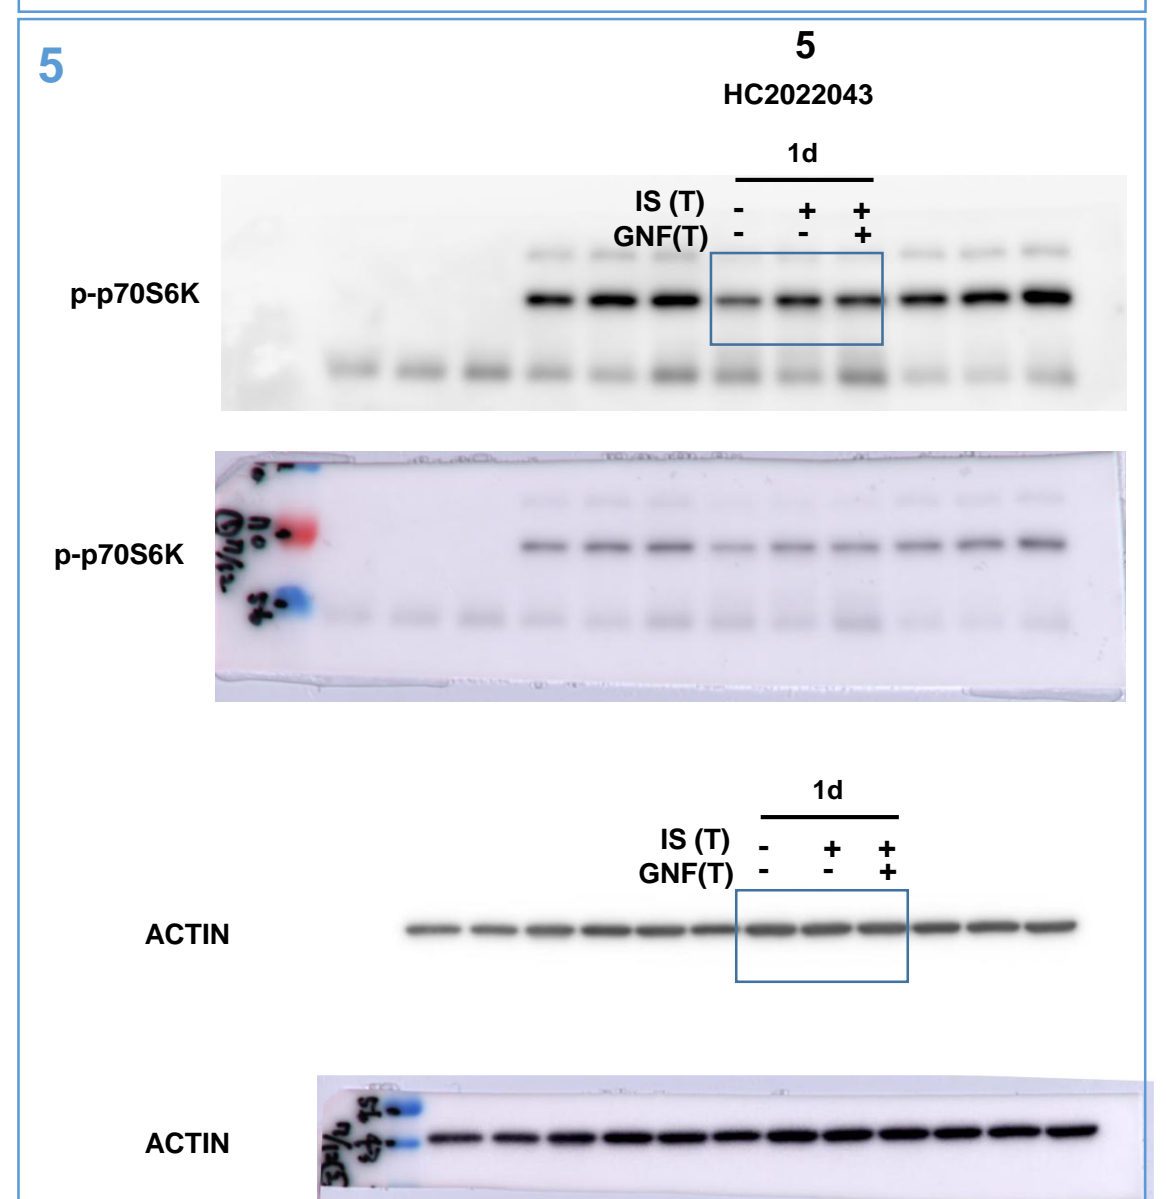

Supplement: fig4-figsupp1-data2 [file elife-87316-fig4-figsupp1-data2-v1.pdf]
