# Supplementary material for: Uremic toxin indoxyl sulfate induces trained immunity via the AhR-dependent arachidonic acid pathway in end-stage renal disease (ESRD)
Source: eLife journal article supplement (doi:10.7554/elife.87316), 2023-06-06
Supplement: fig5-data2 [file elife-87316-fig5-data2-v1.pdf]

Figure 5F, western blotting data

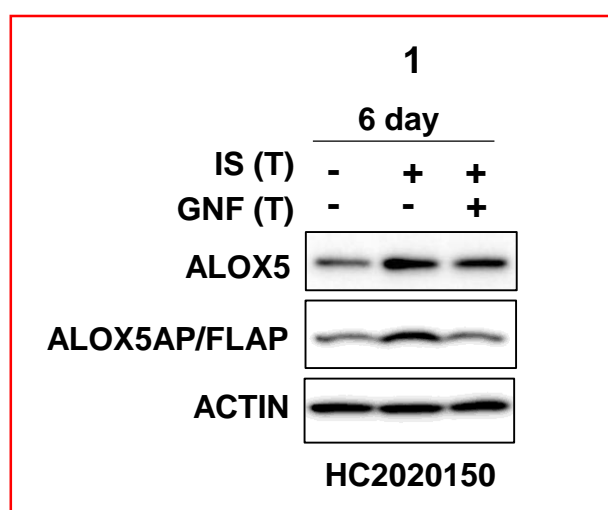

Figure 5F, left panel

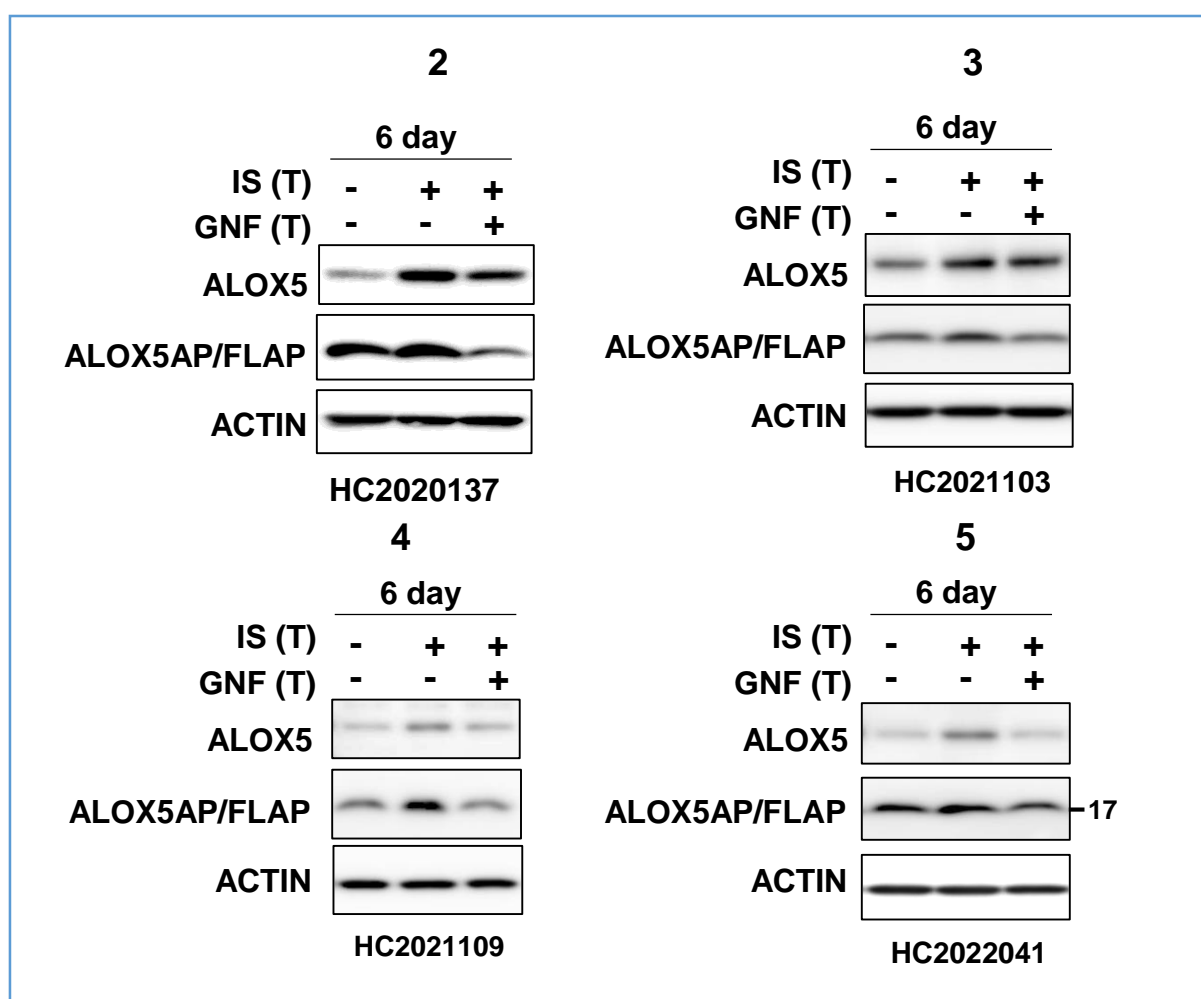

Figure 5F, right graph

Figure 5F, western blotting data

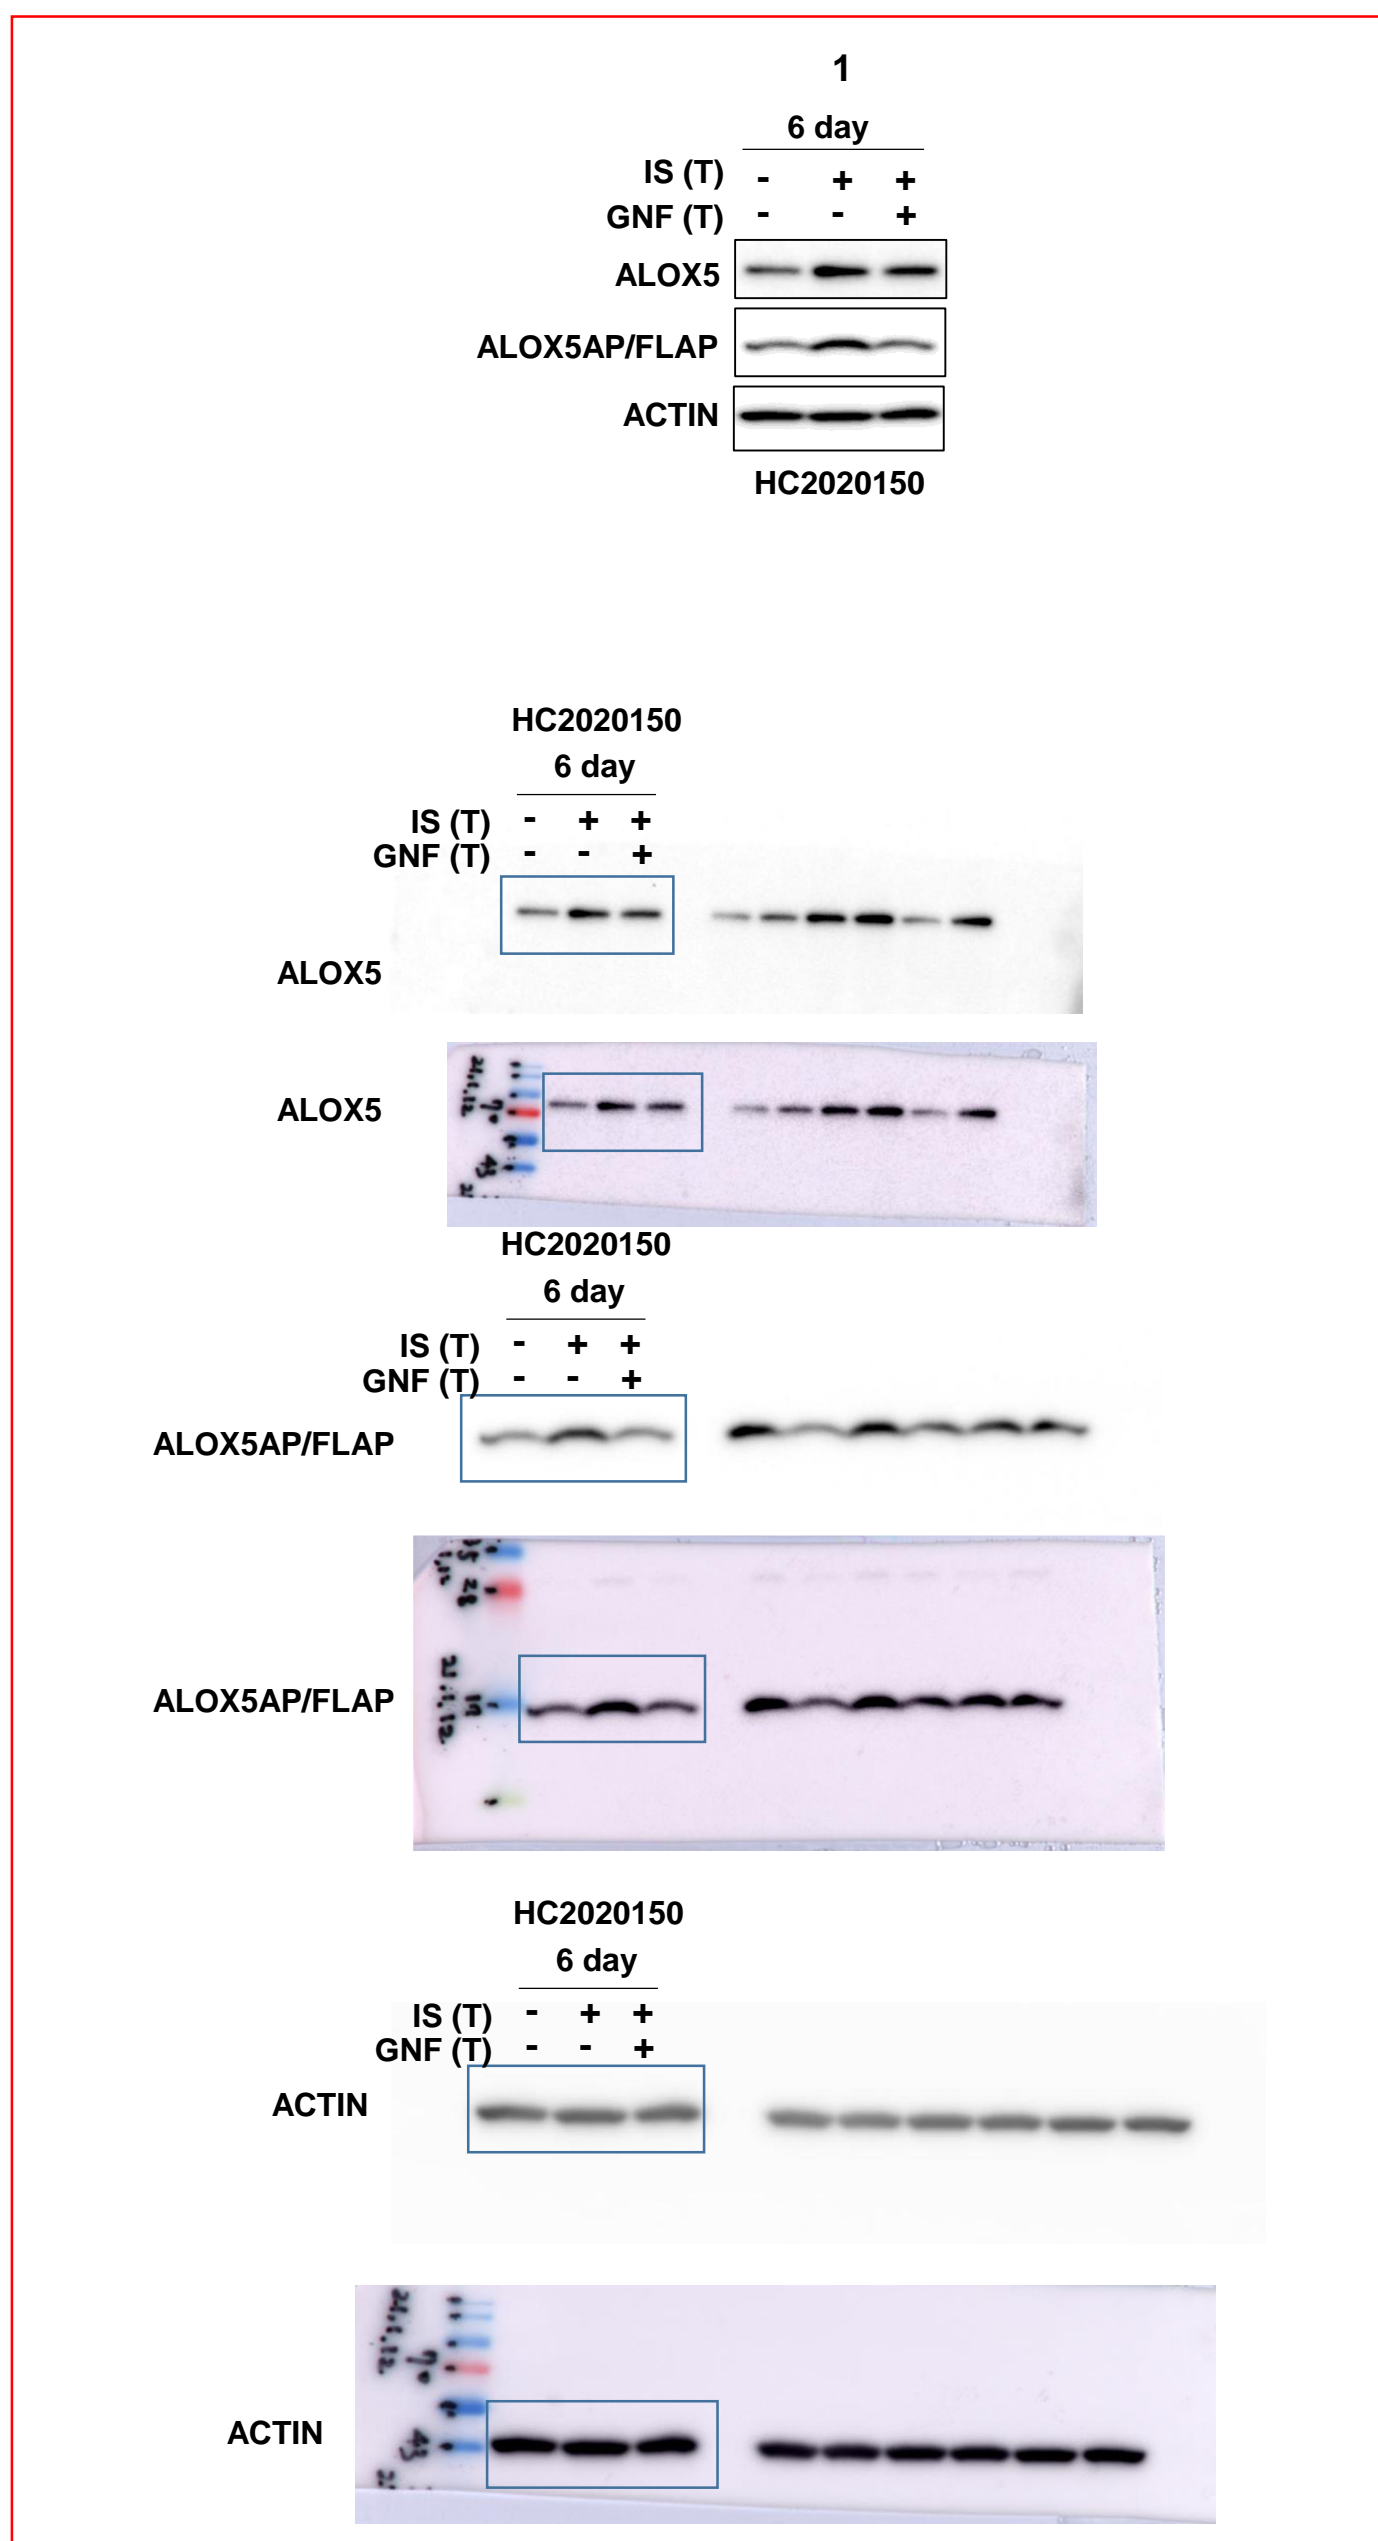

→ File name: Alox5\_HC2020150.jpg  
Alox5ap\_HC2020150.jpg  
Actin\_HC2020150.jpg

Figure 5F, western blotting data

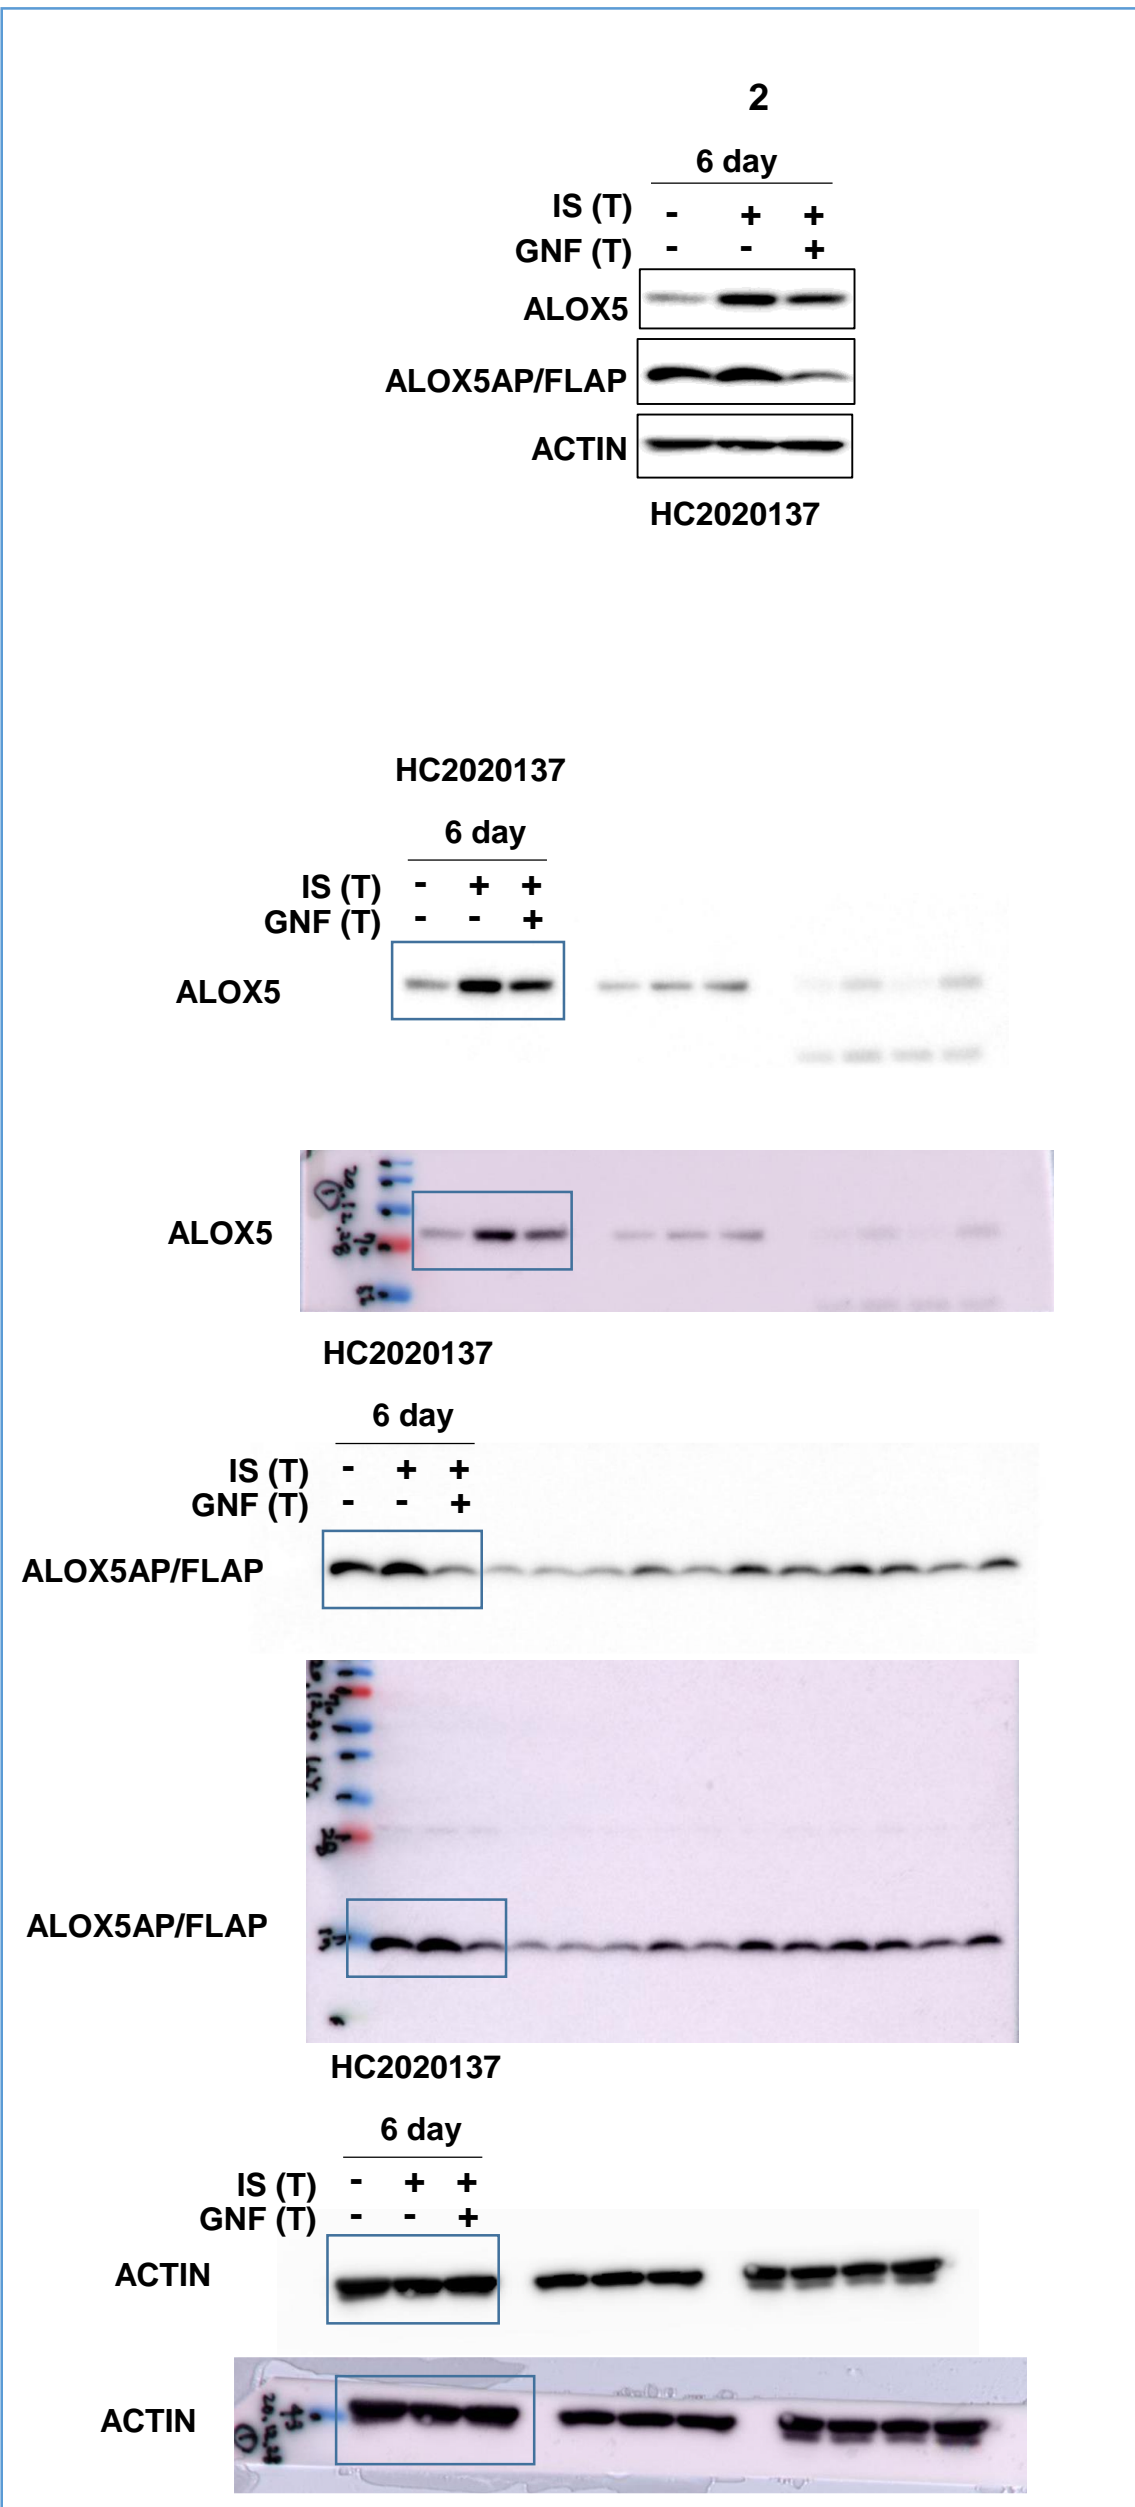

→ File name: Alox5\_HC2020137.jpg  
 Alox5ap\_HC2020137.jpg  
 Actin\_HC2020137.jpg

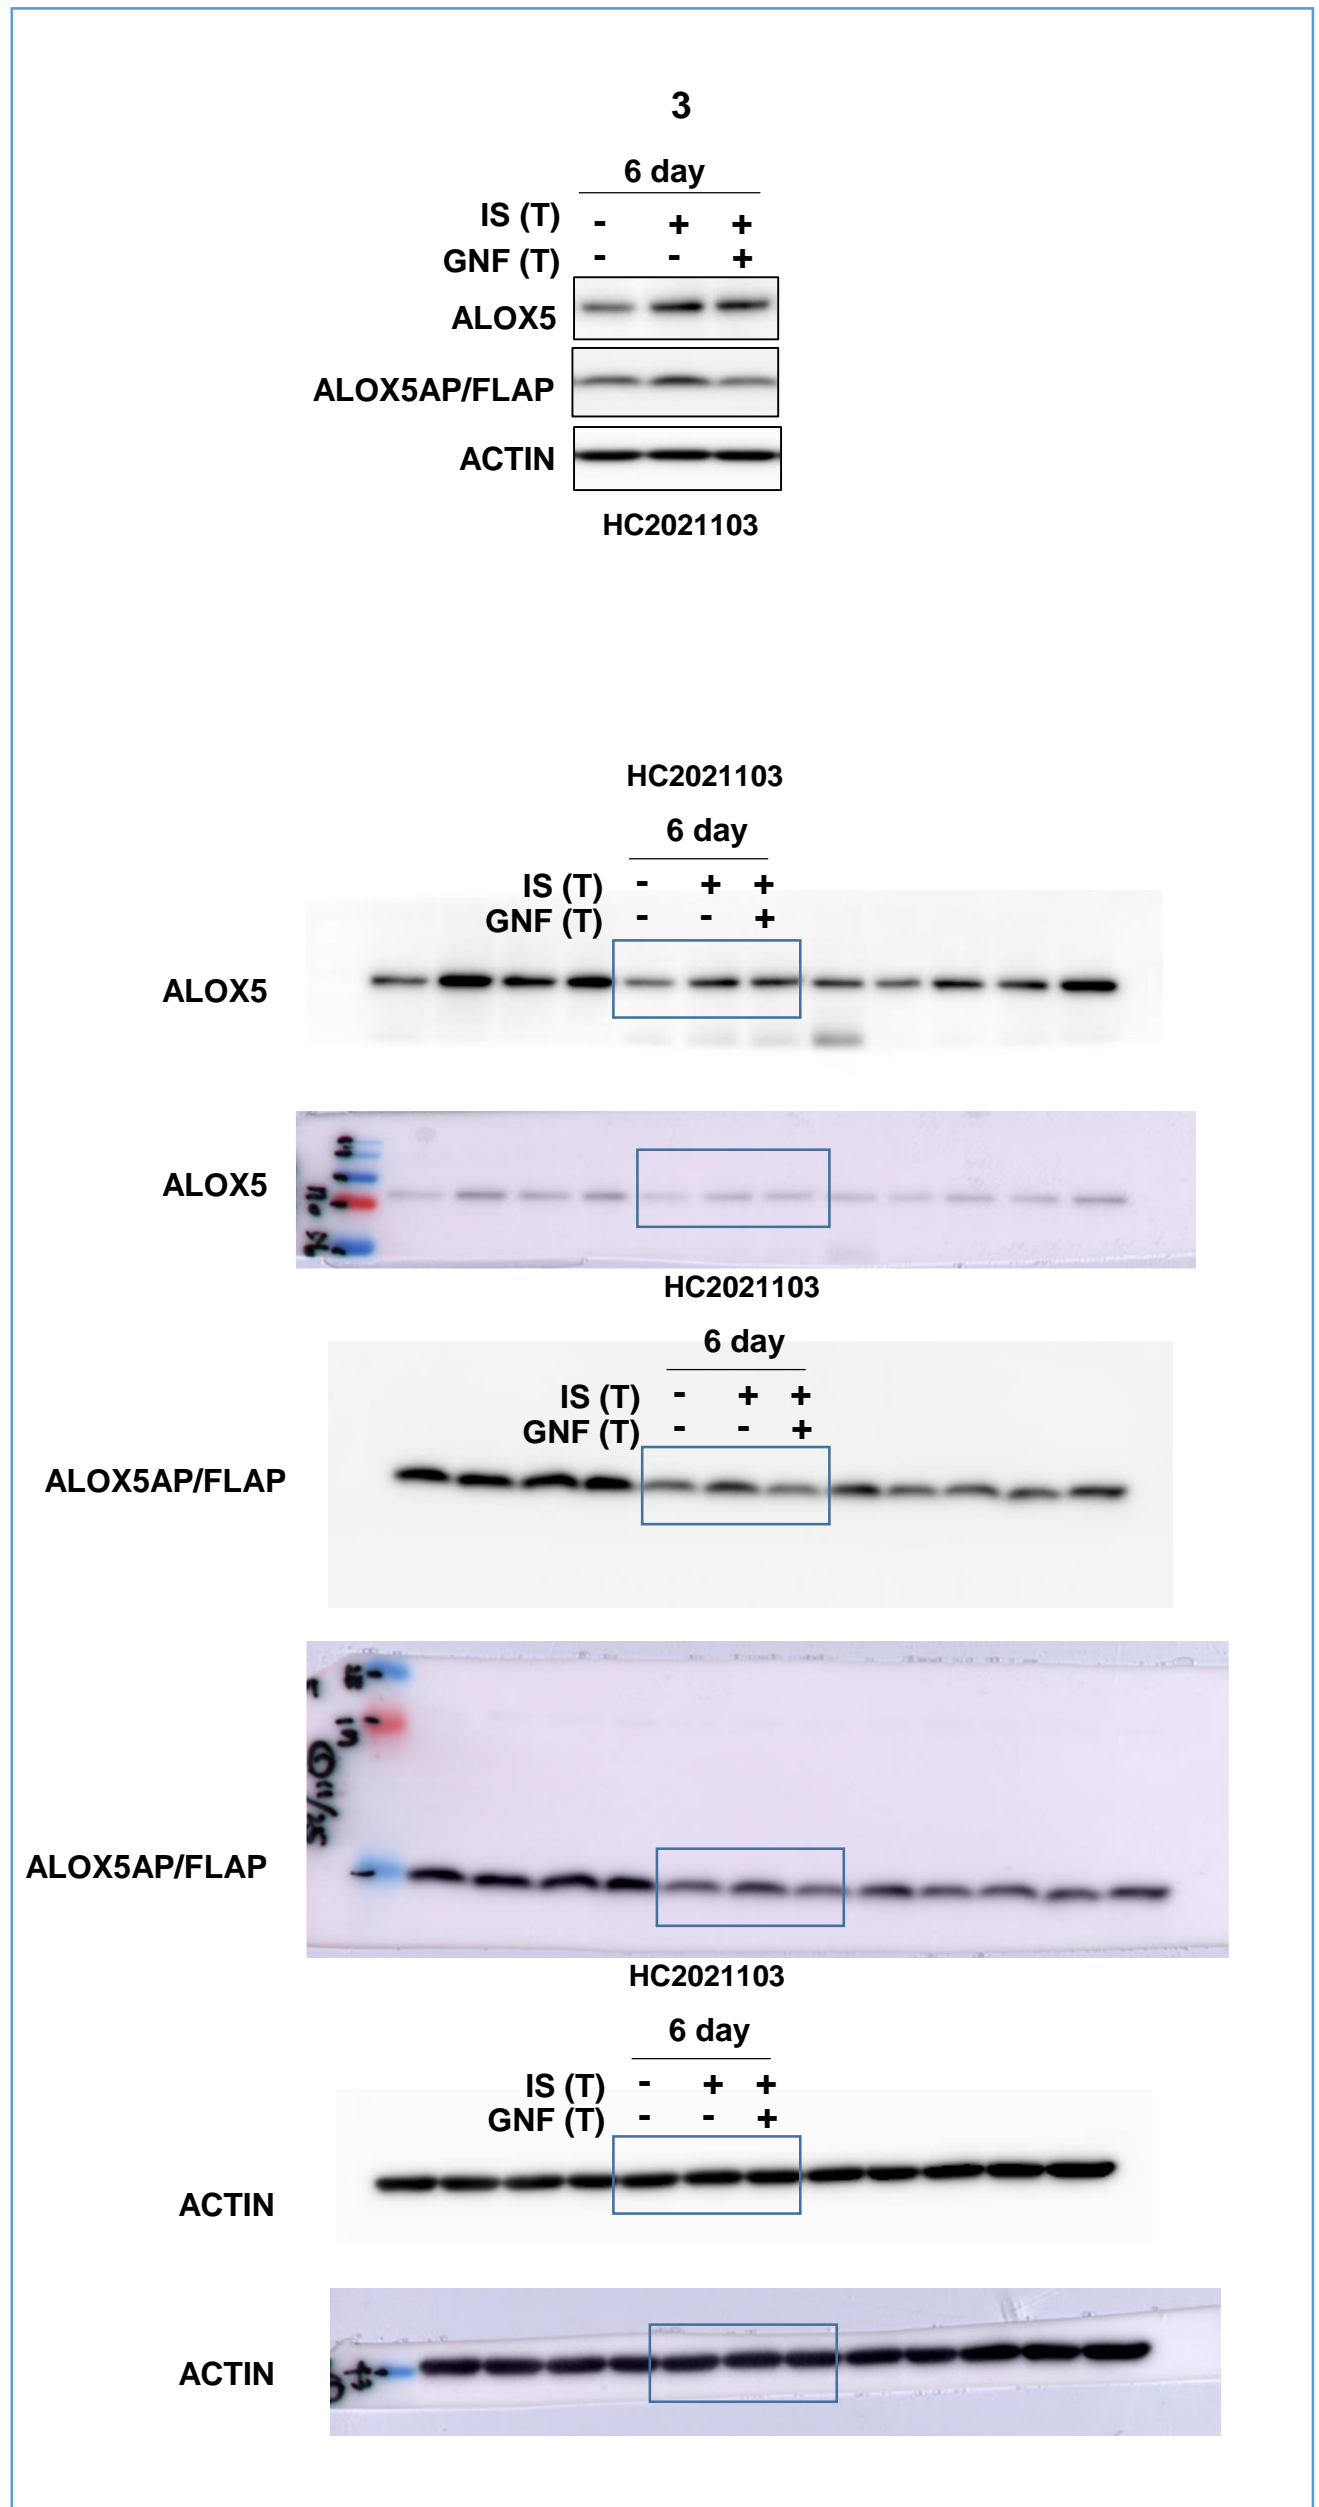

→ File name: Alox5\_HC2021103.jpg  
 Alox5ap\_HC2021103.jpg  
 Actin\_HC2021103.jpg

Figure 5F, western blotting data

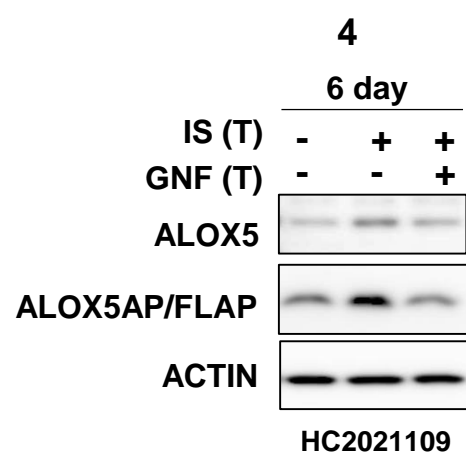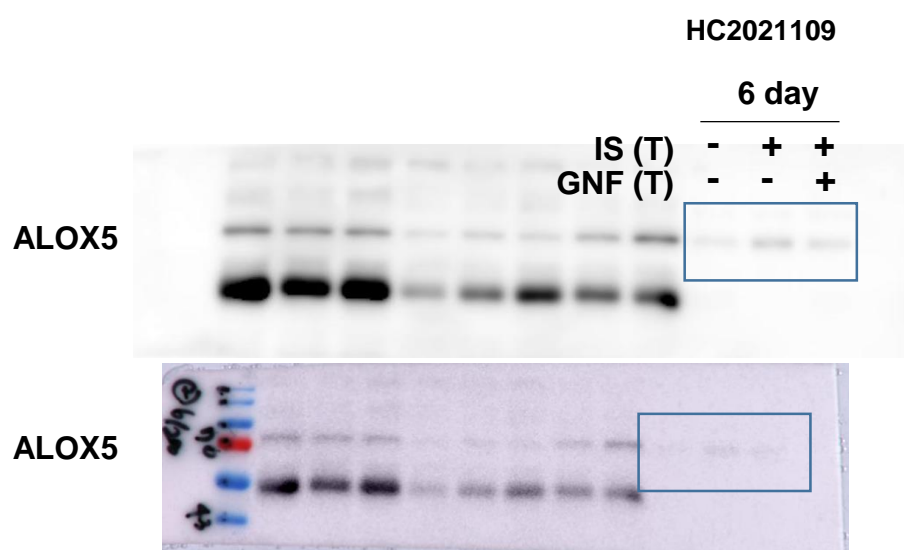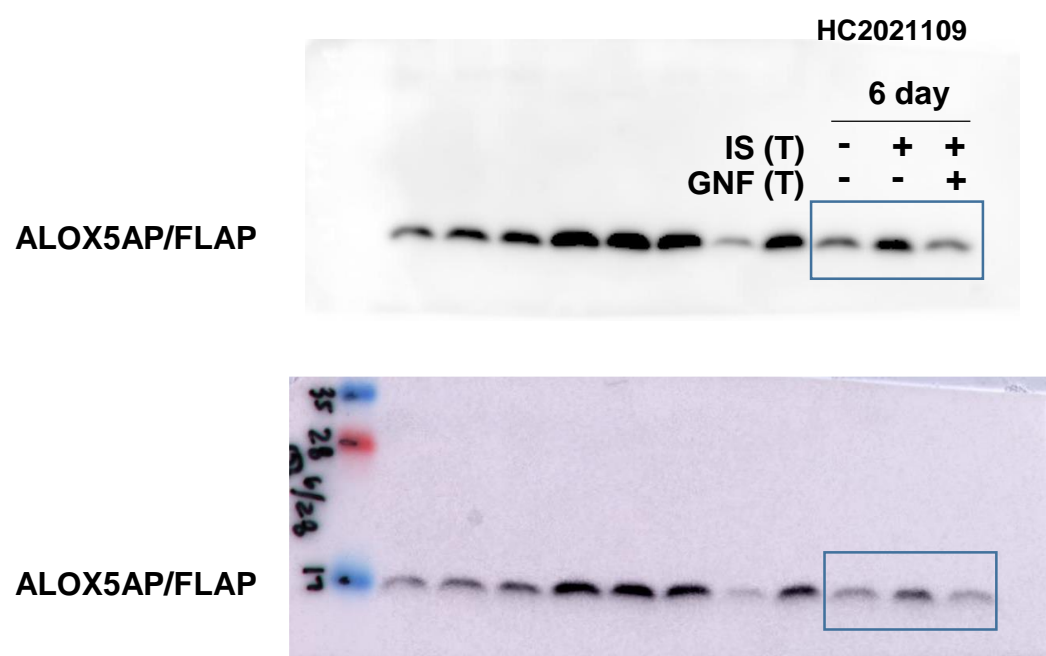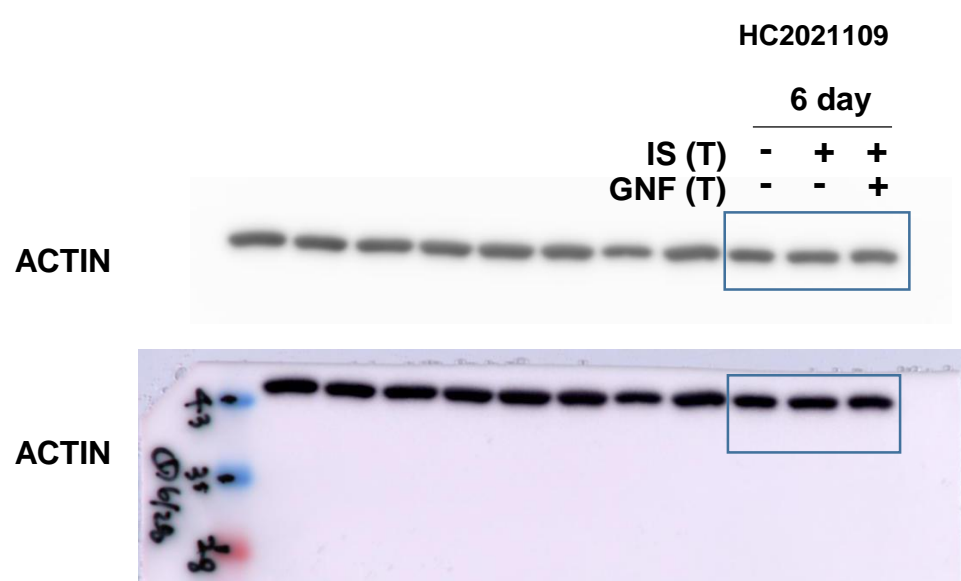

→ File name: Alox5\_Alox5ap\_HC2021109.jpg  
Actin\_HC2021109.jpg

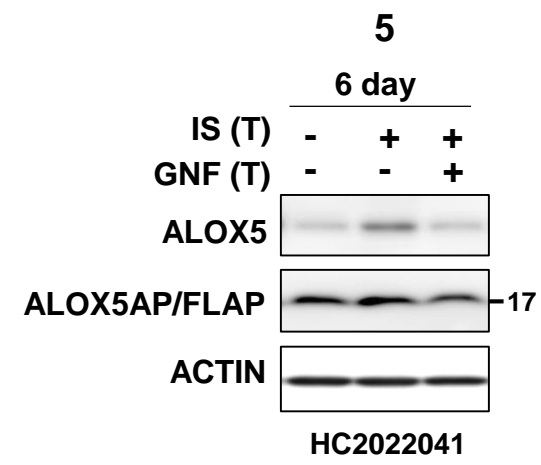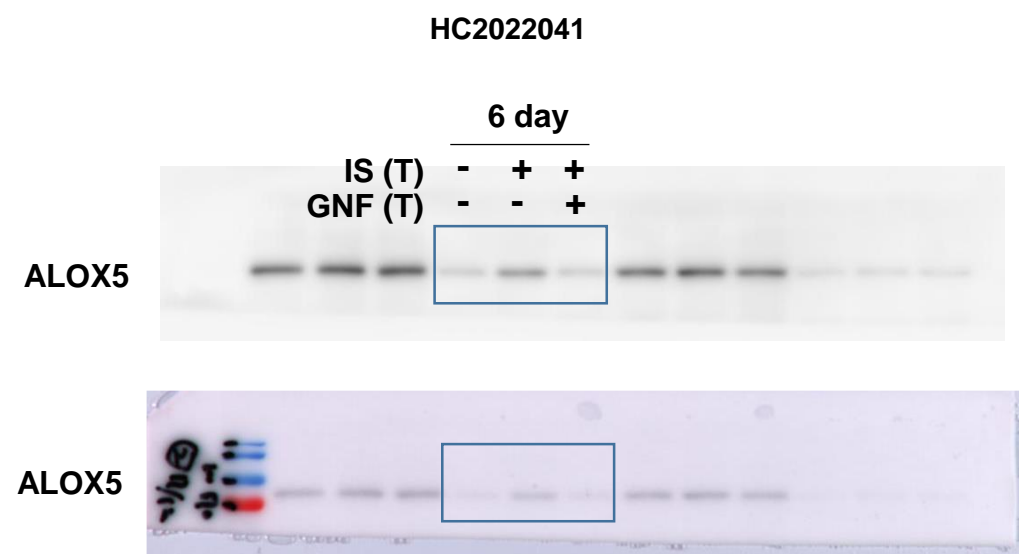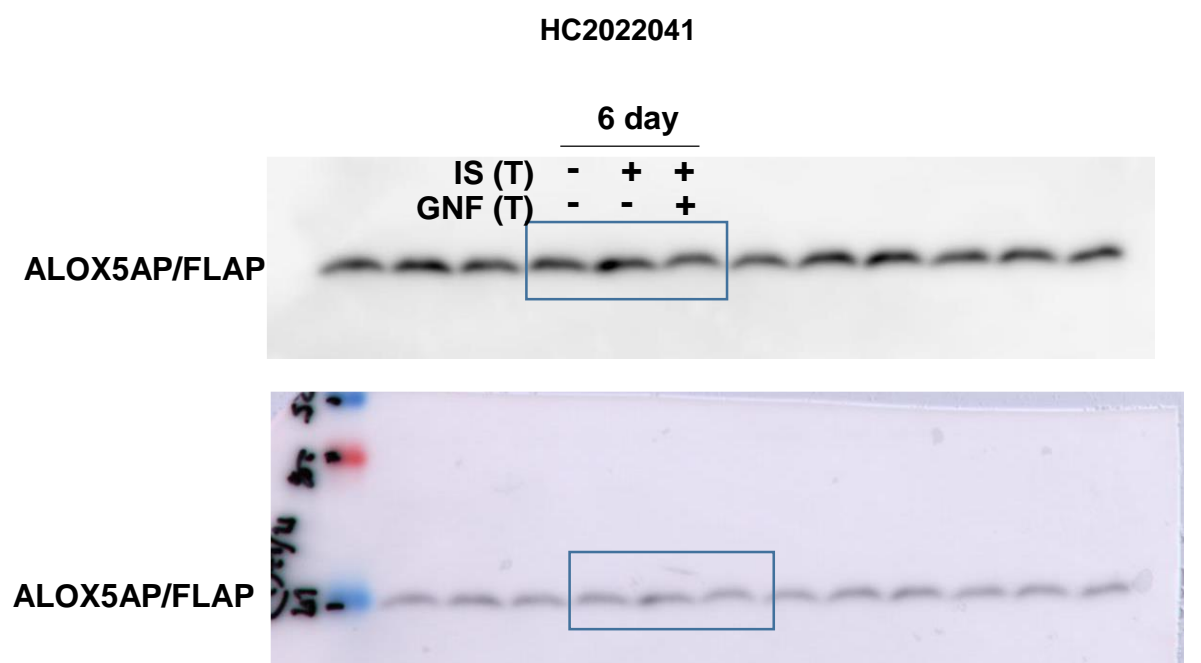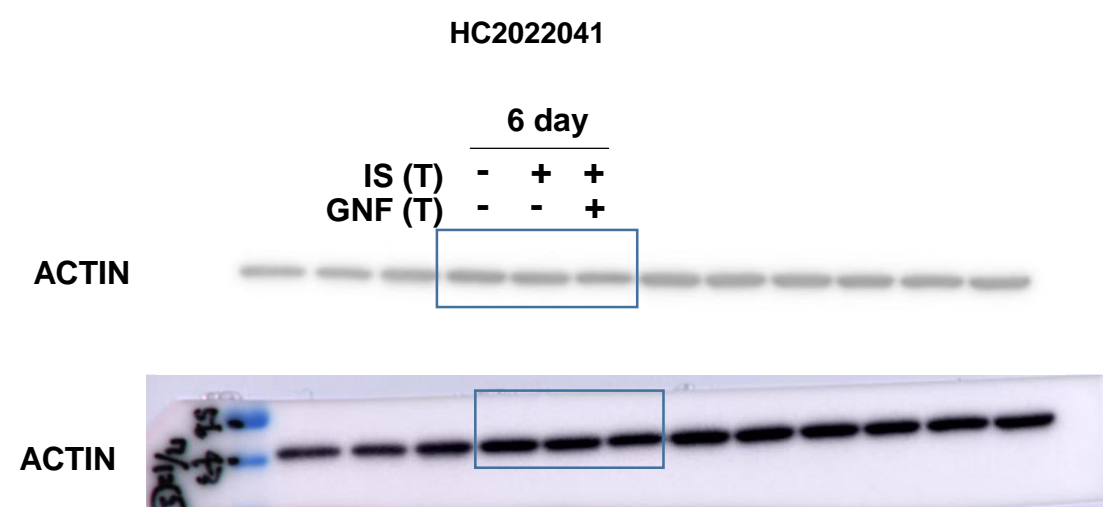

→ File name: Alox5\_Alox5ap\_HC2022041.jpg  
Actin\_HC2022041.jpg
