# Supplementary material for: Uremic toxin indoxyl sulfate induces trained immunity via the AhR-dependent arachidonic acid pathway in end-stage renal disease (ESRD)
Source: eLife journal article supplement (doi:10.7554/elife.87316), 2023-06-06
Supplement: fig5-figsupp1-data2 [file elife-87316-fig5-figsupp1-data2-v1.pdf]

Figure 5-figure supplement 1I, western blotting data

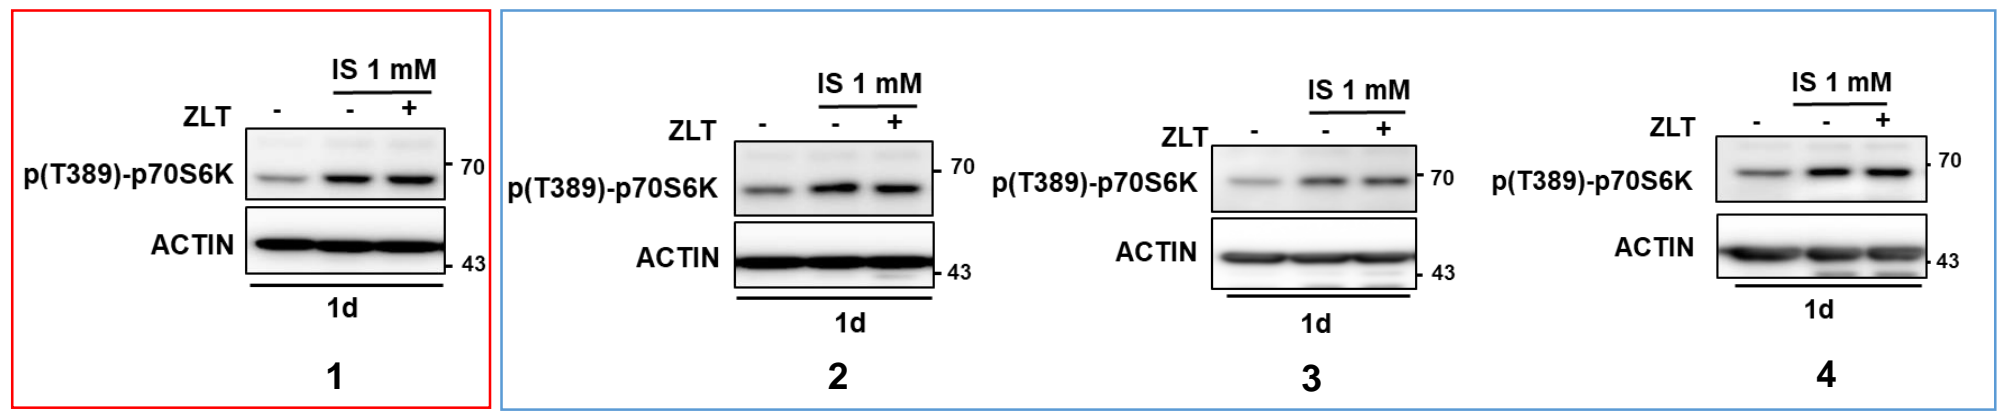

Figure 5-sFig. 1I, left panel

Figure 5-sFig. 1I, right graph

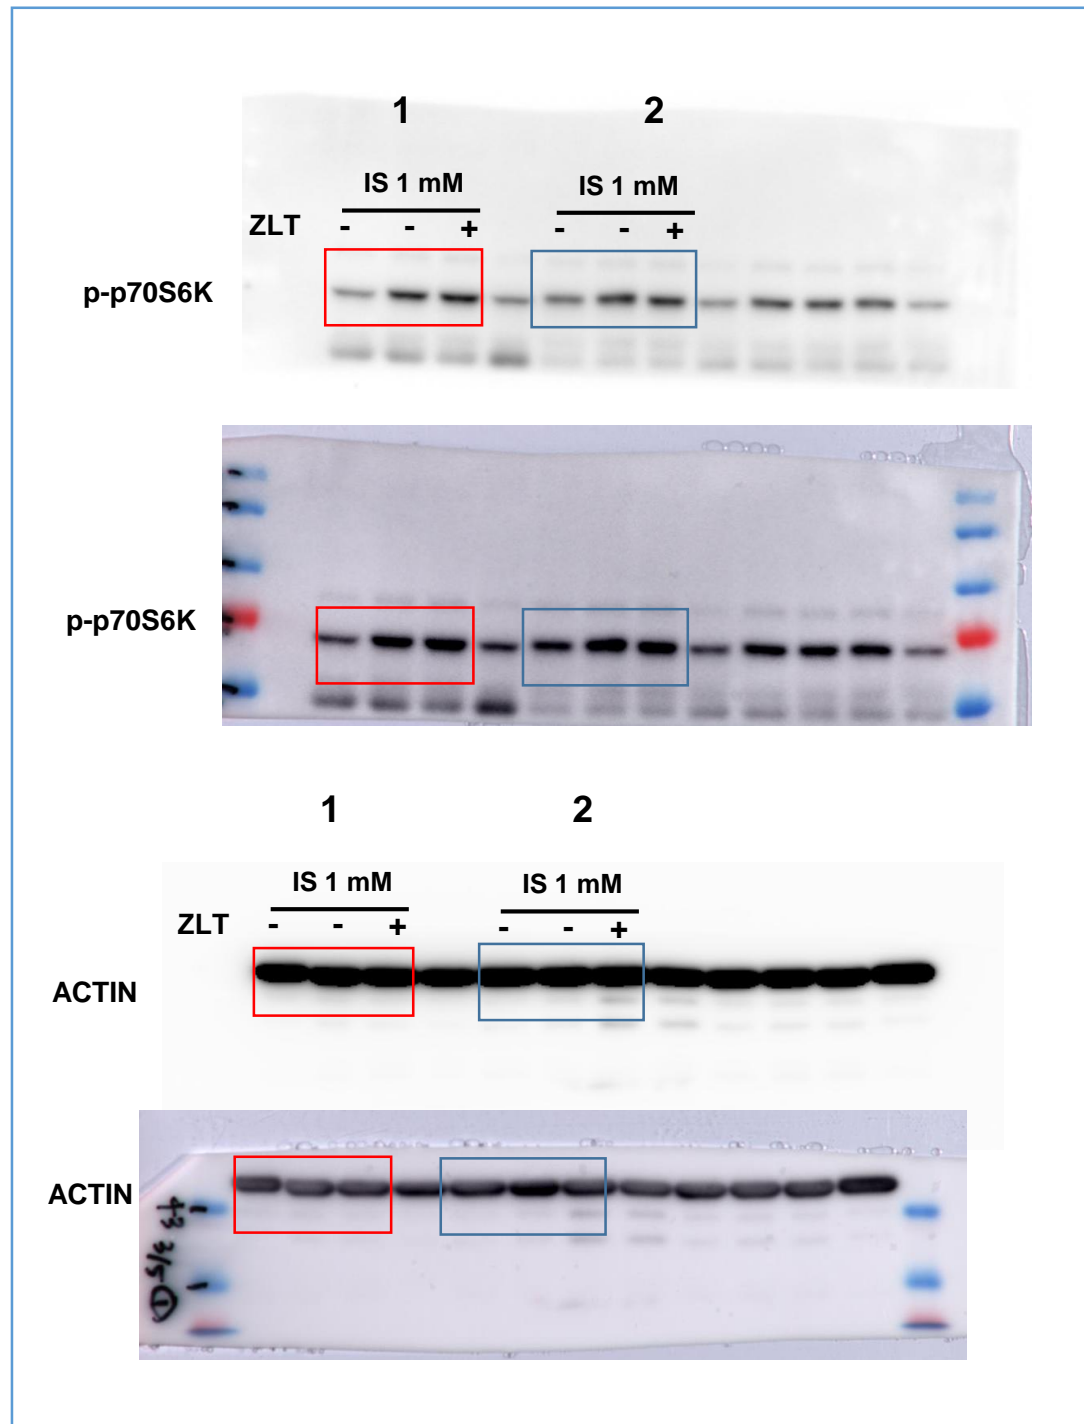

→ File name: pS6K\_1-2.jpg  
Actin\_1-2.jpg

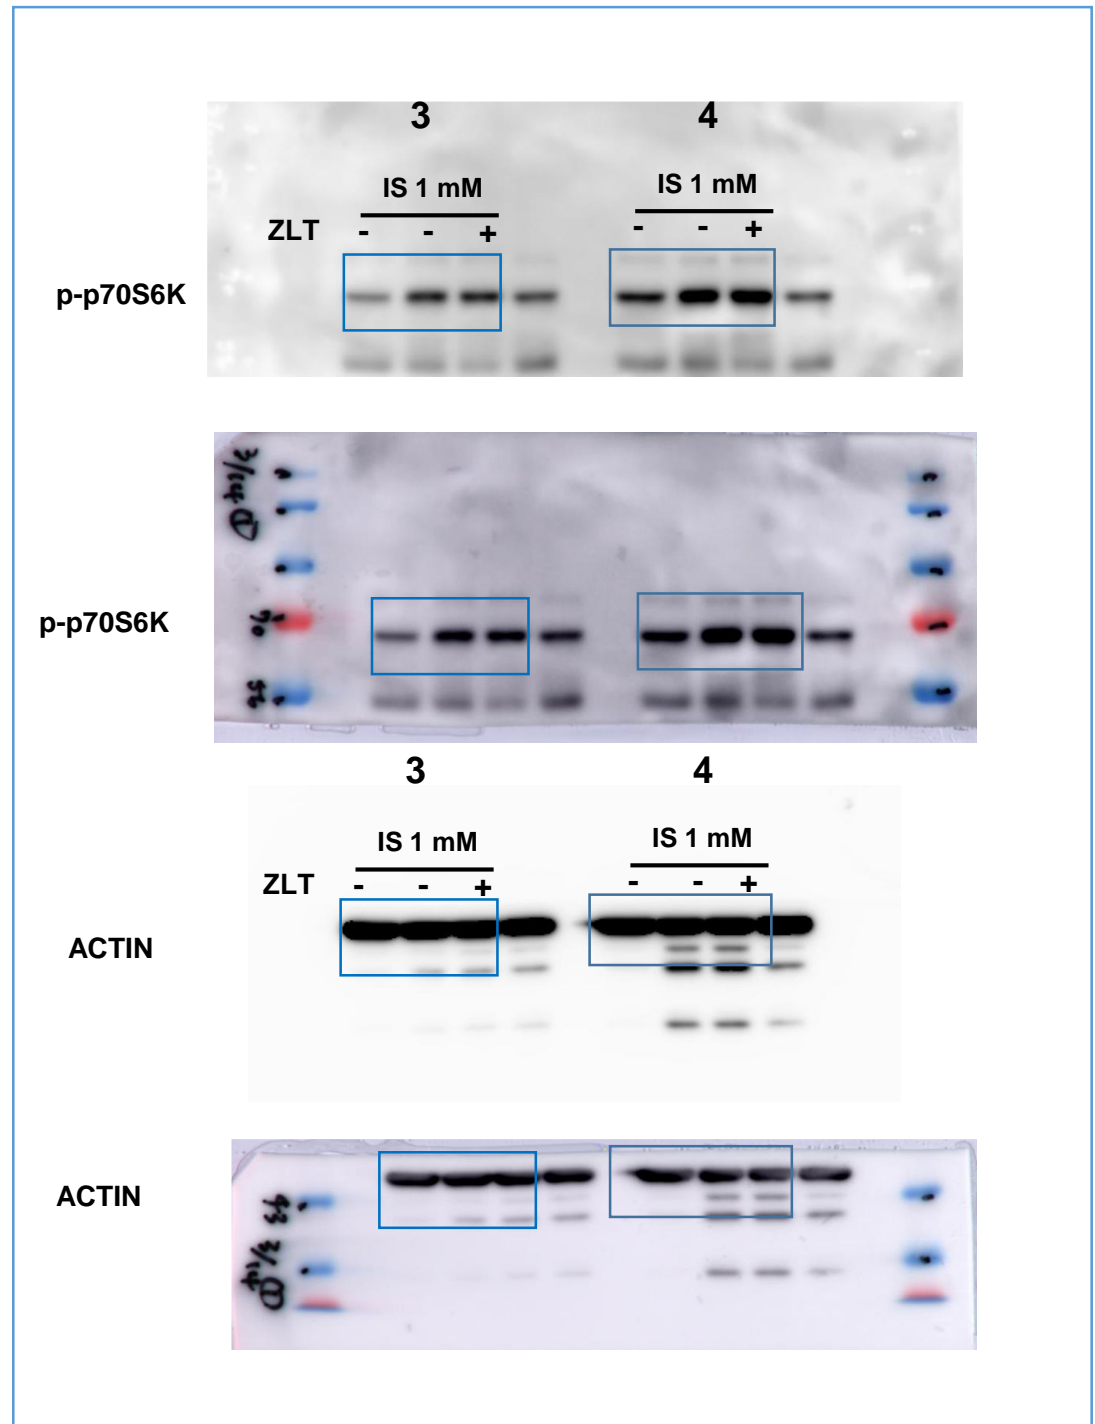

→ File name: pS6K\_3-4.jpg  
Actin\_3-4.jpg
