# Supplementary material for: Uremic toxin indoxyl sulfate induces trained immunity via the AhR-dependent arachidonic acid pathway in end-stage renal disease (ESRD)
Source: eLife journal article supplement (doi:10.7554/elife.87316), 2023-06-06
Supplement: fig6-data2 [file elife-87316-fig6-data2-v1.pdf]

Figure 6E, western blotting data

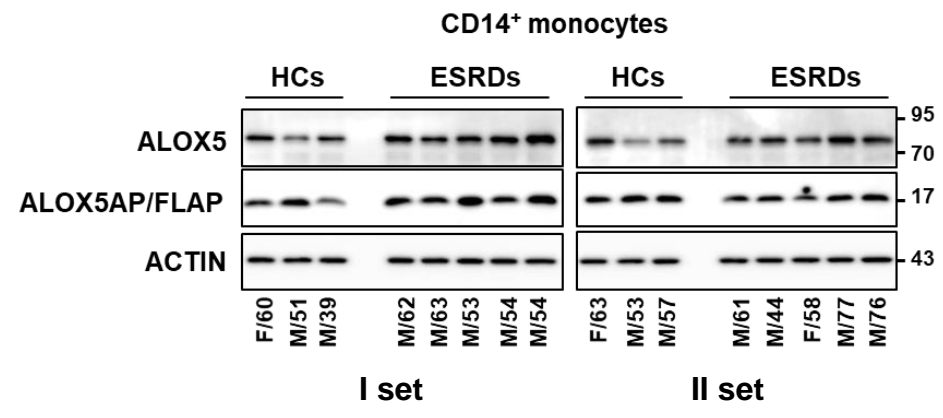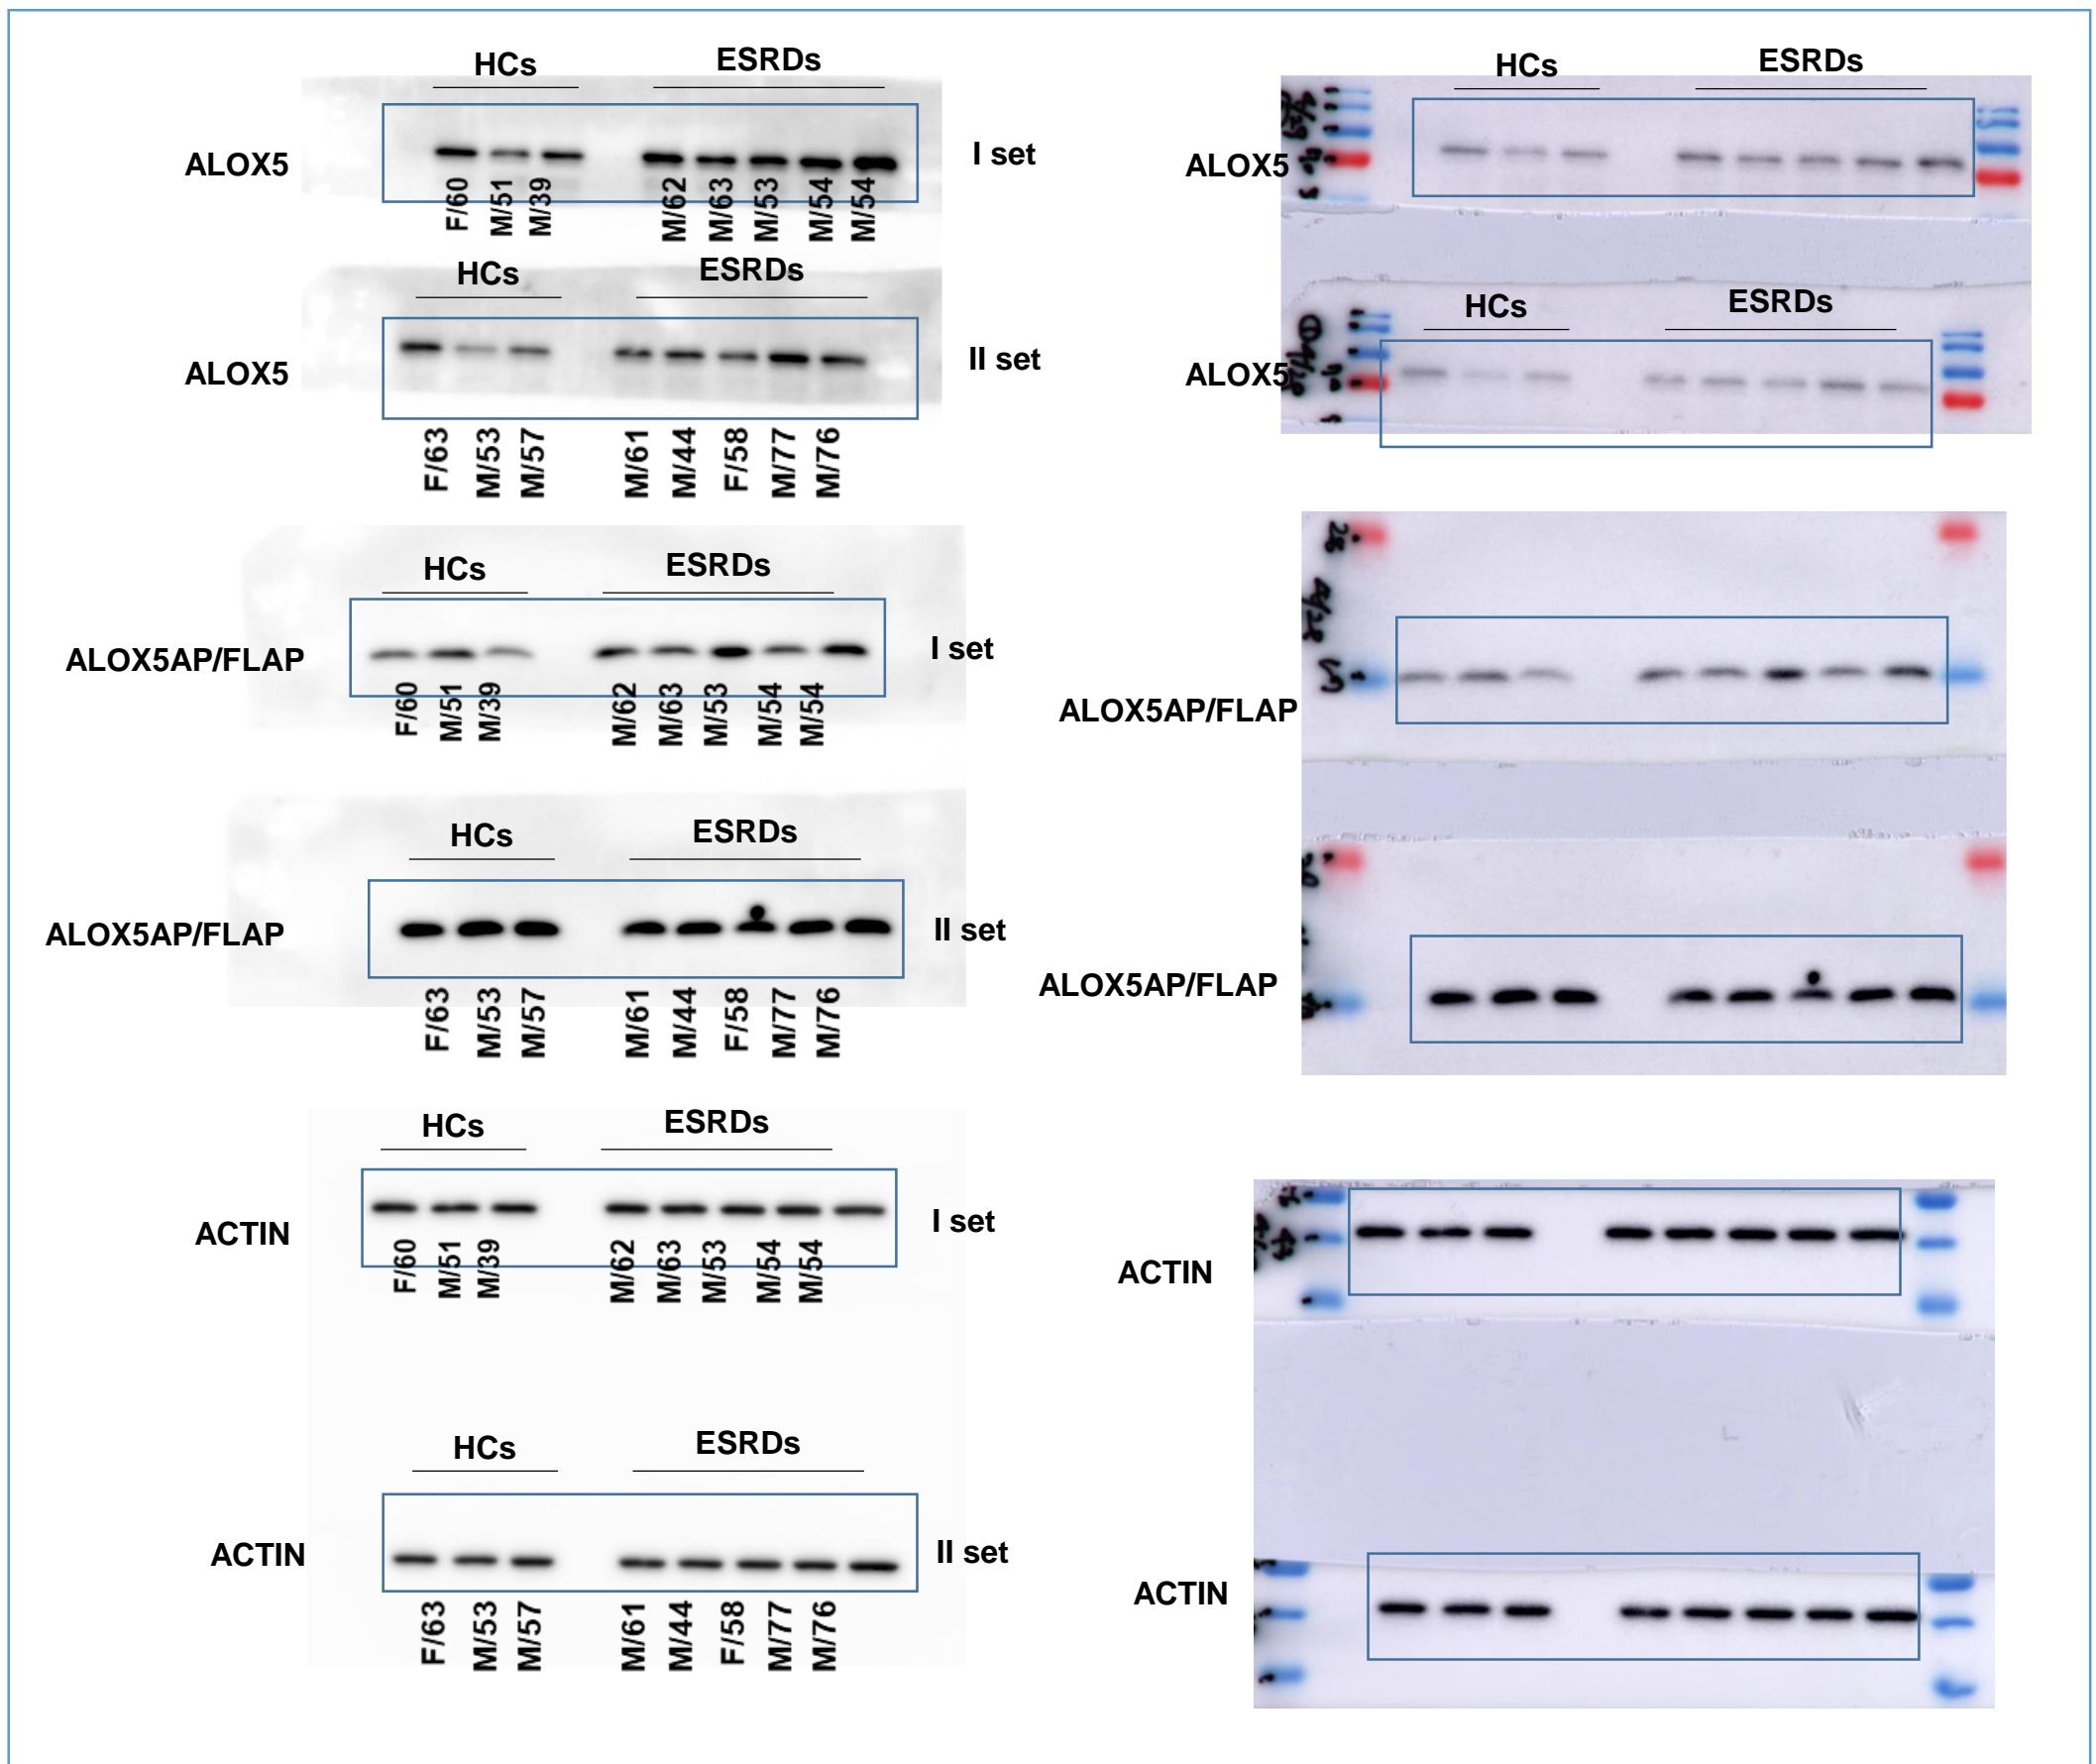

→ File name: Alox5\_Alox5ap\_mo.jpg  
Actin\_mo.jpg

Figure 6G, western blotting data

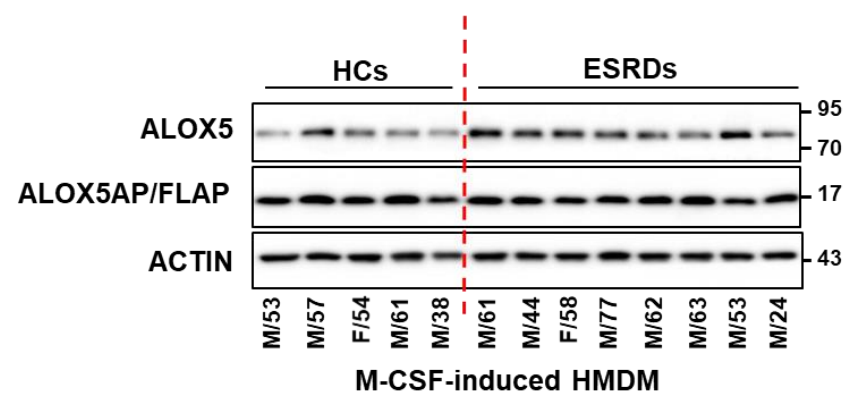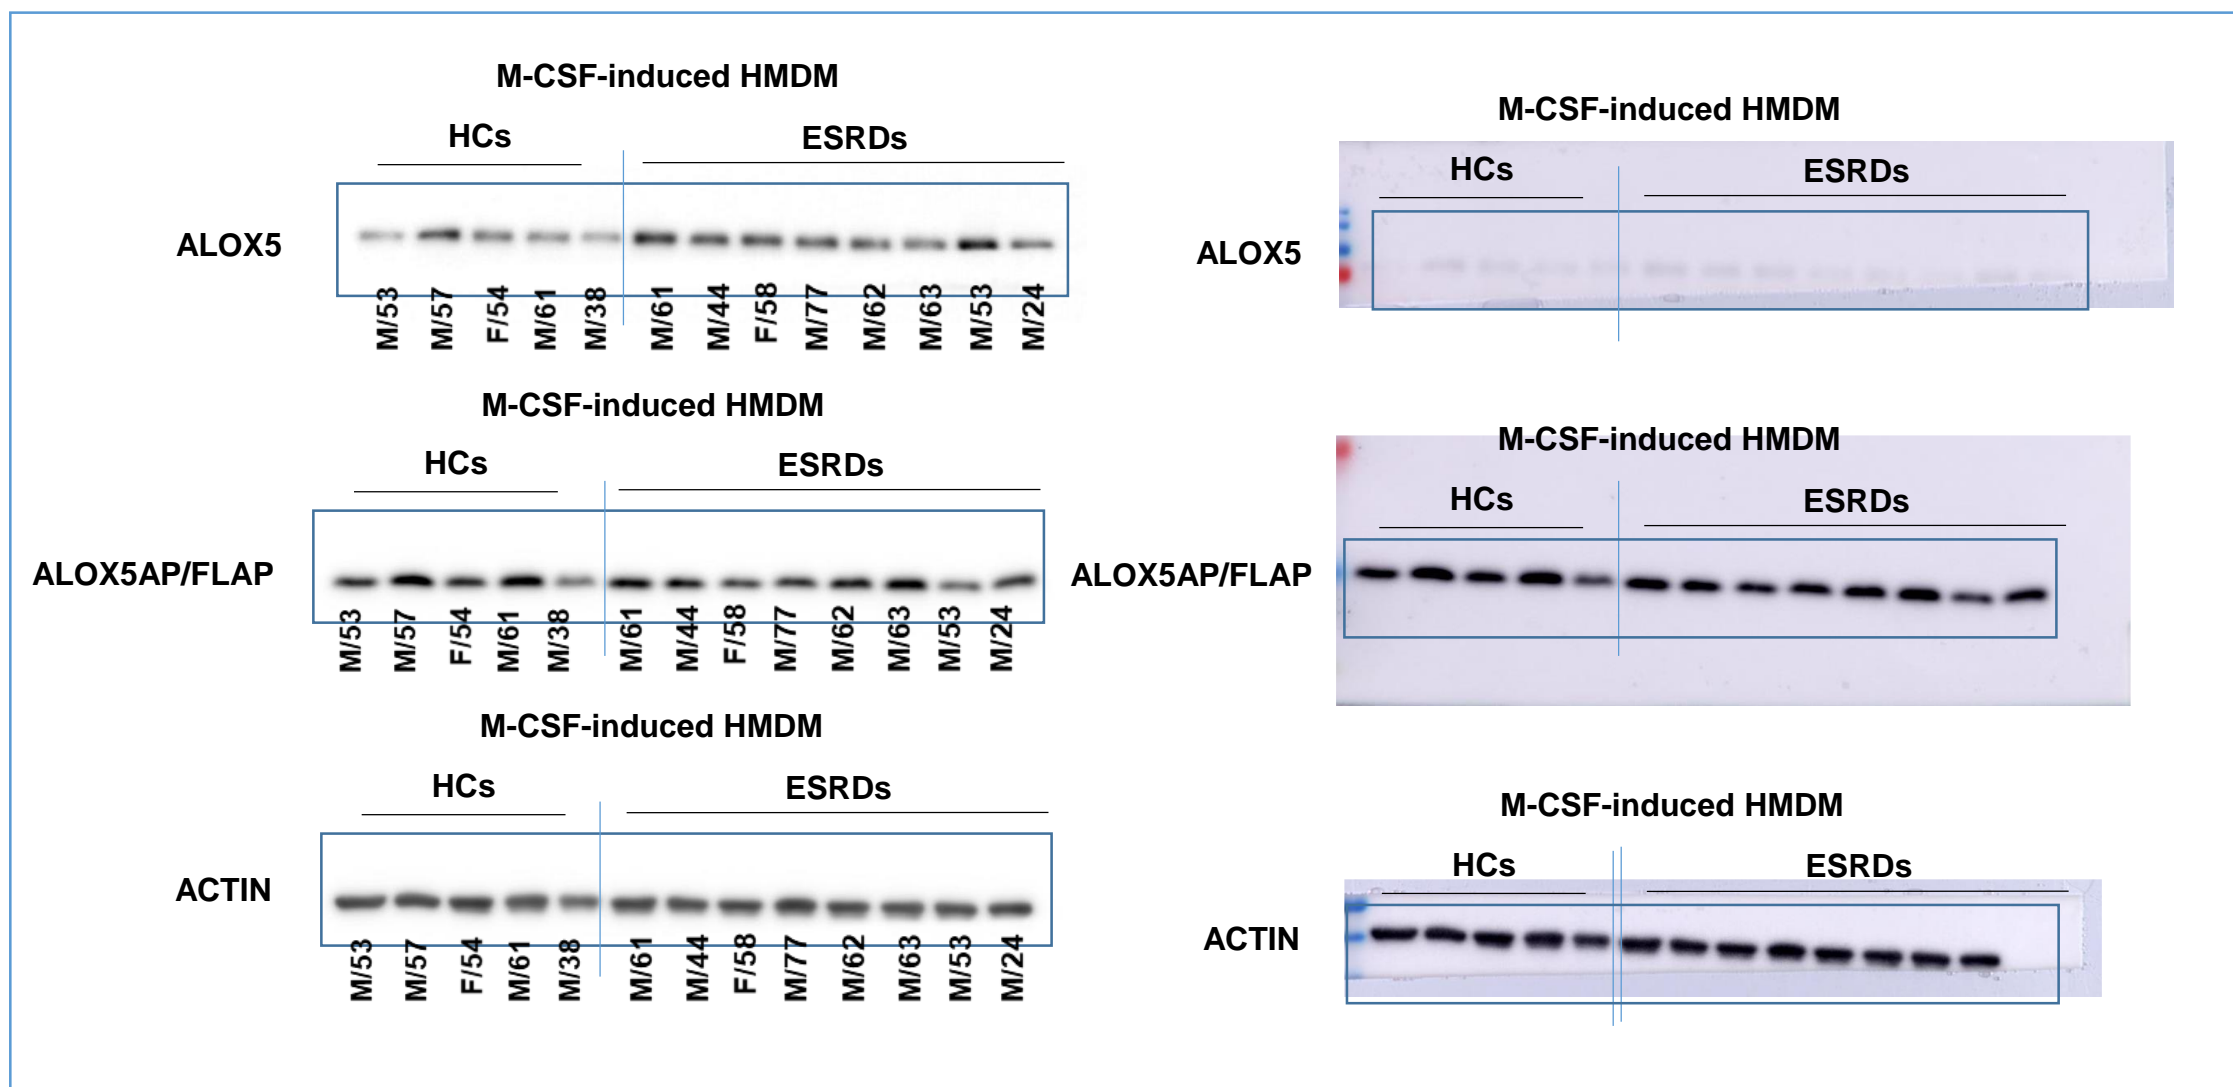

→ File name: [ALOX5\\_HMDM.jpg](#)  
[ALOX5AP\\_HMDM.jpg](#)  
[Actin\\_HMDM.jpg](#)

Figure 6L, western blotting data

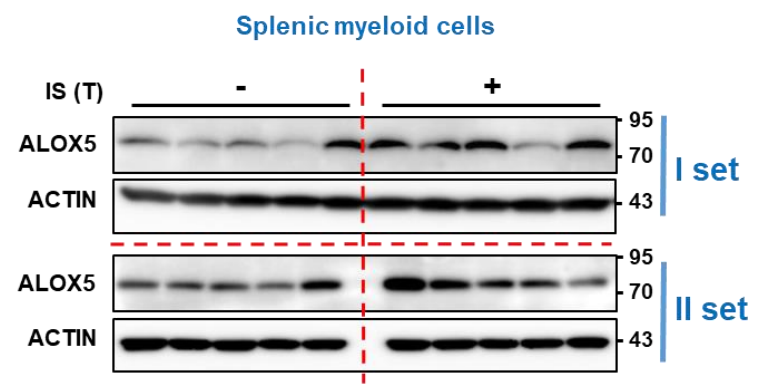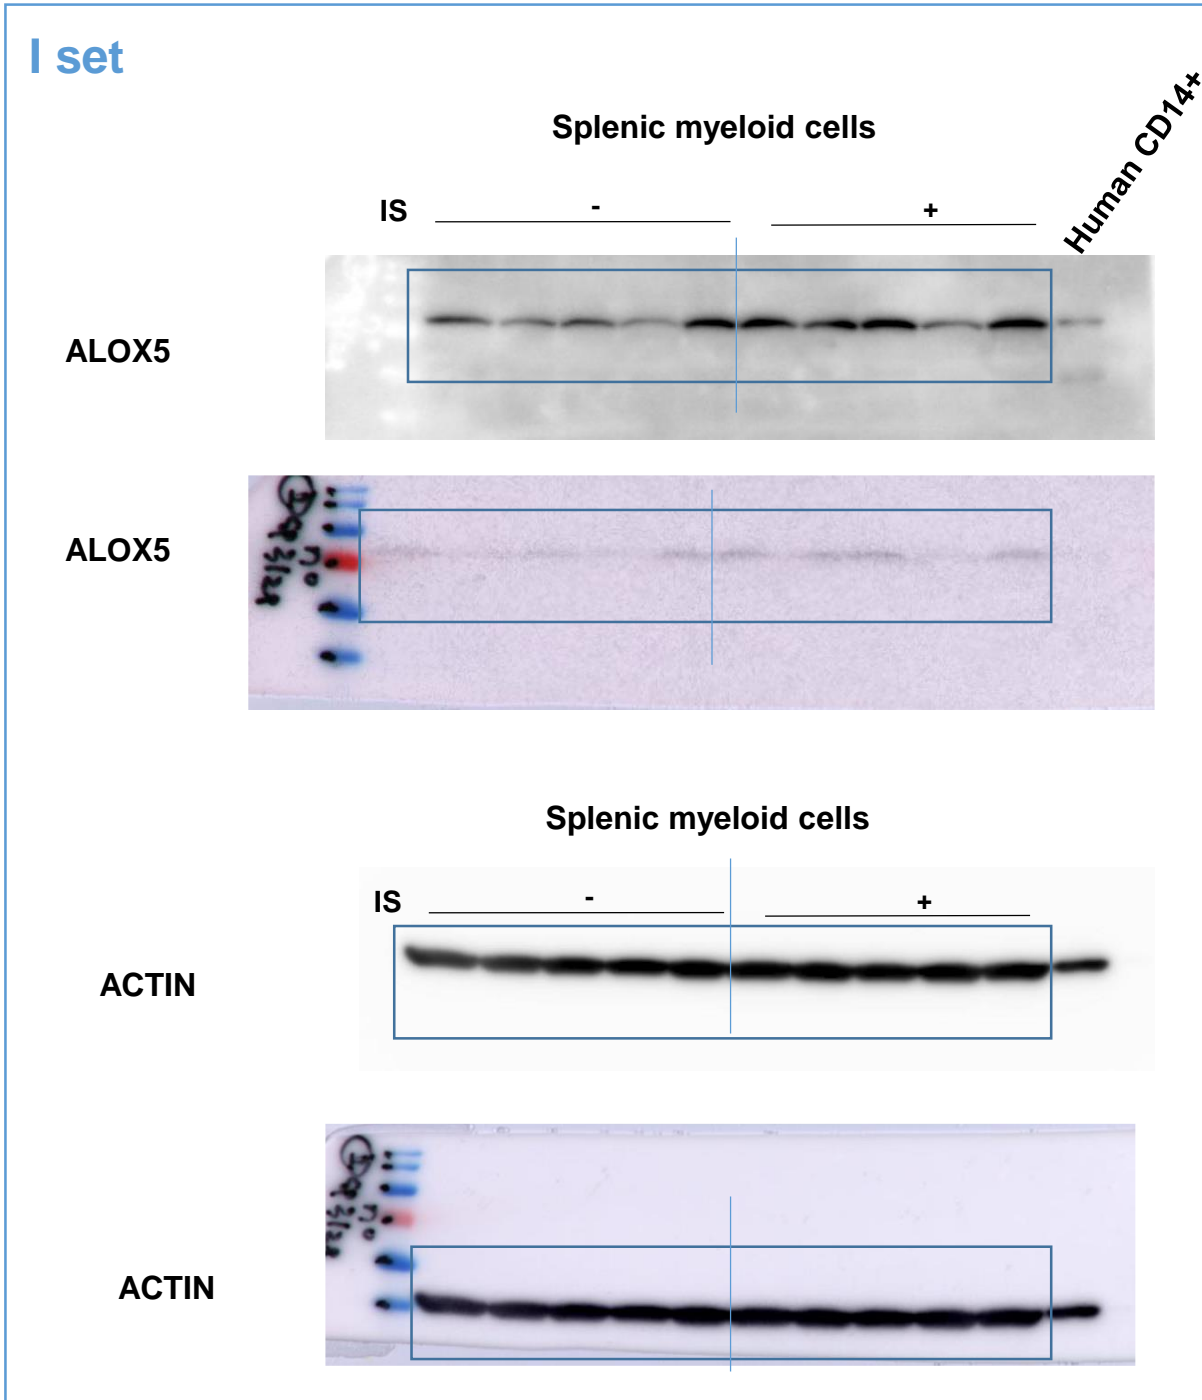

→ File name: mALOX5-1\_sp.jpg  
mActin-1\_sp.jpg

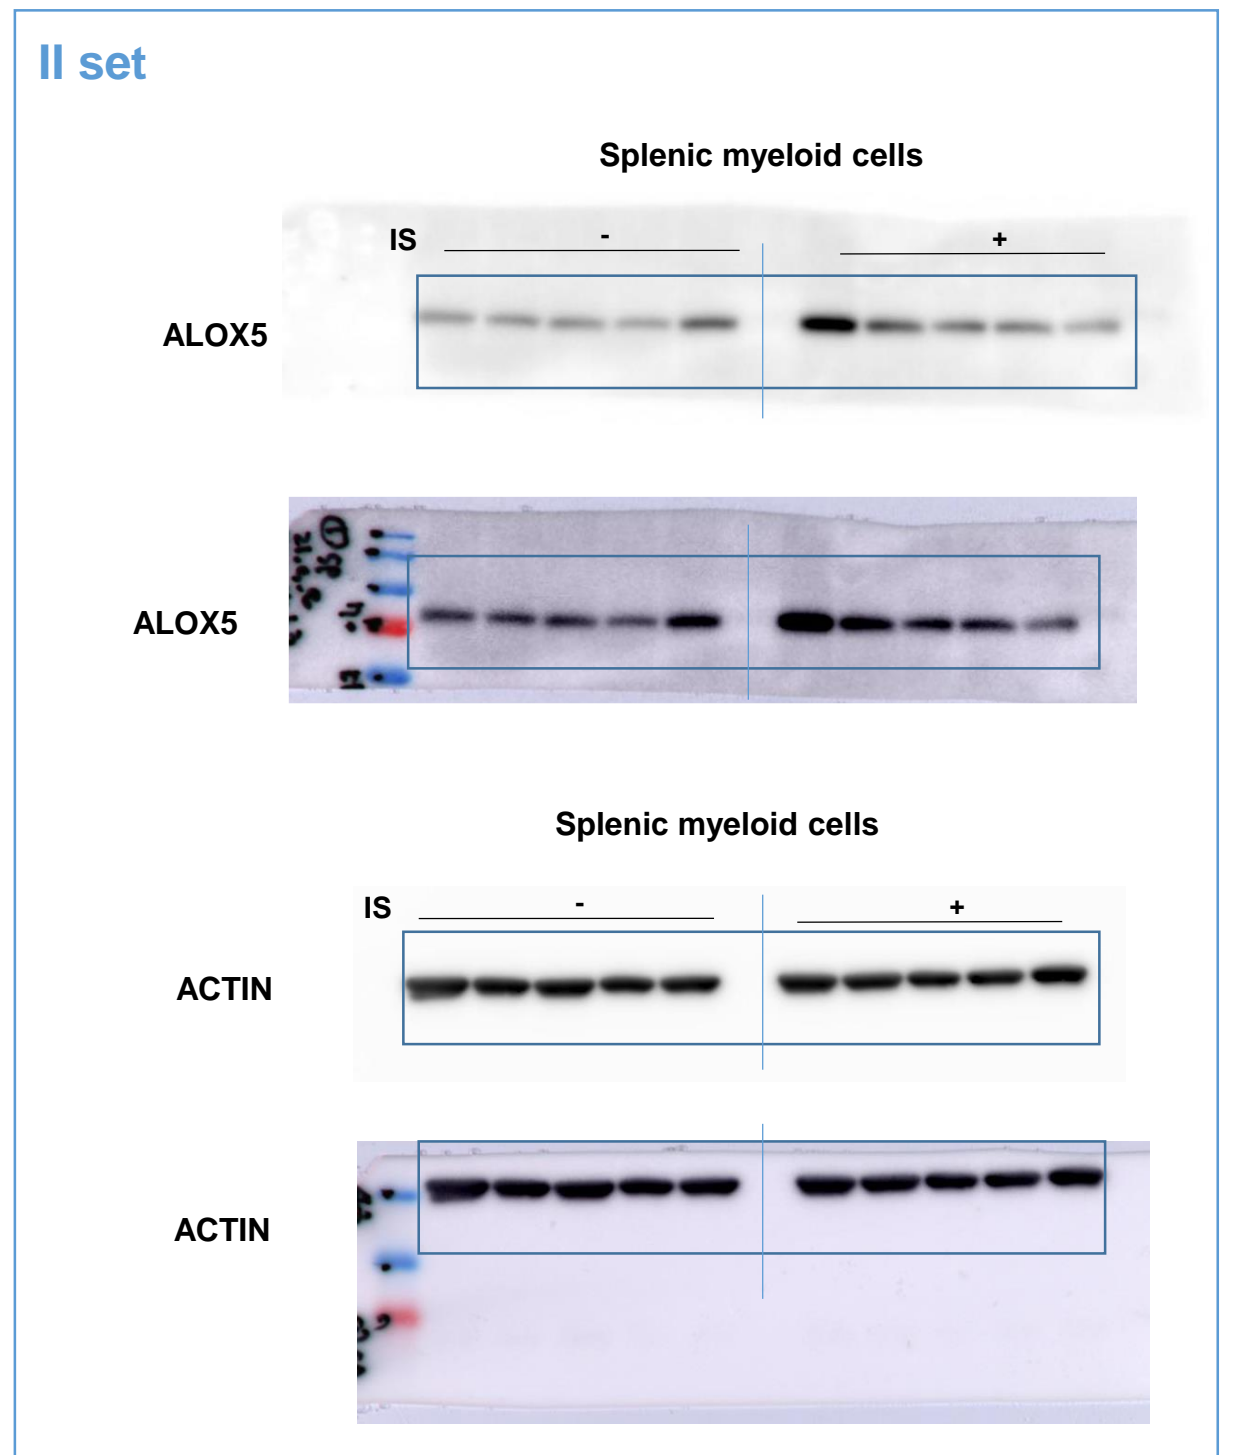

→ File name: mALOX5\_sp.jpg  
mActin\_sp.jpg
