# Supplementary material for: Uremic toxin indoxyl sulfate induces trained immunity via the AhR-dependent arachidonic acid pathway in end-stage renal disease (ESRD)
Source: eLife journal article supplement (doi:10.7554/elife.87316), 2023-06-06
Supplement: fig6-figsupp1-data2 [file elife-87316-fig6-figsupp1-data2-v1.pdf]

Figure 6-figure supplement 1E, western blotting data

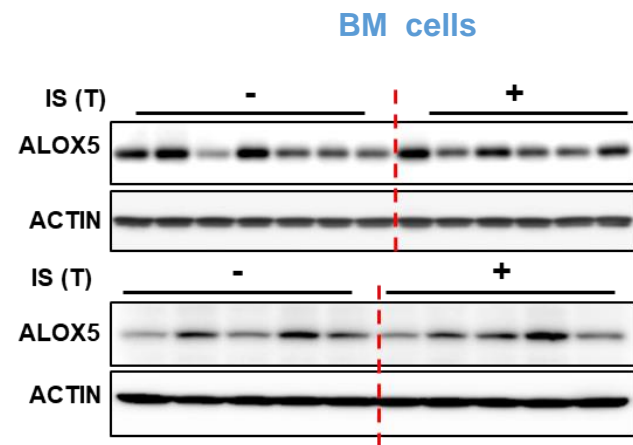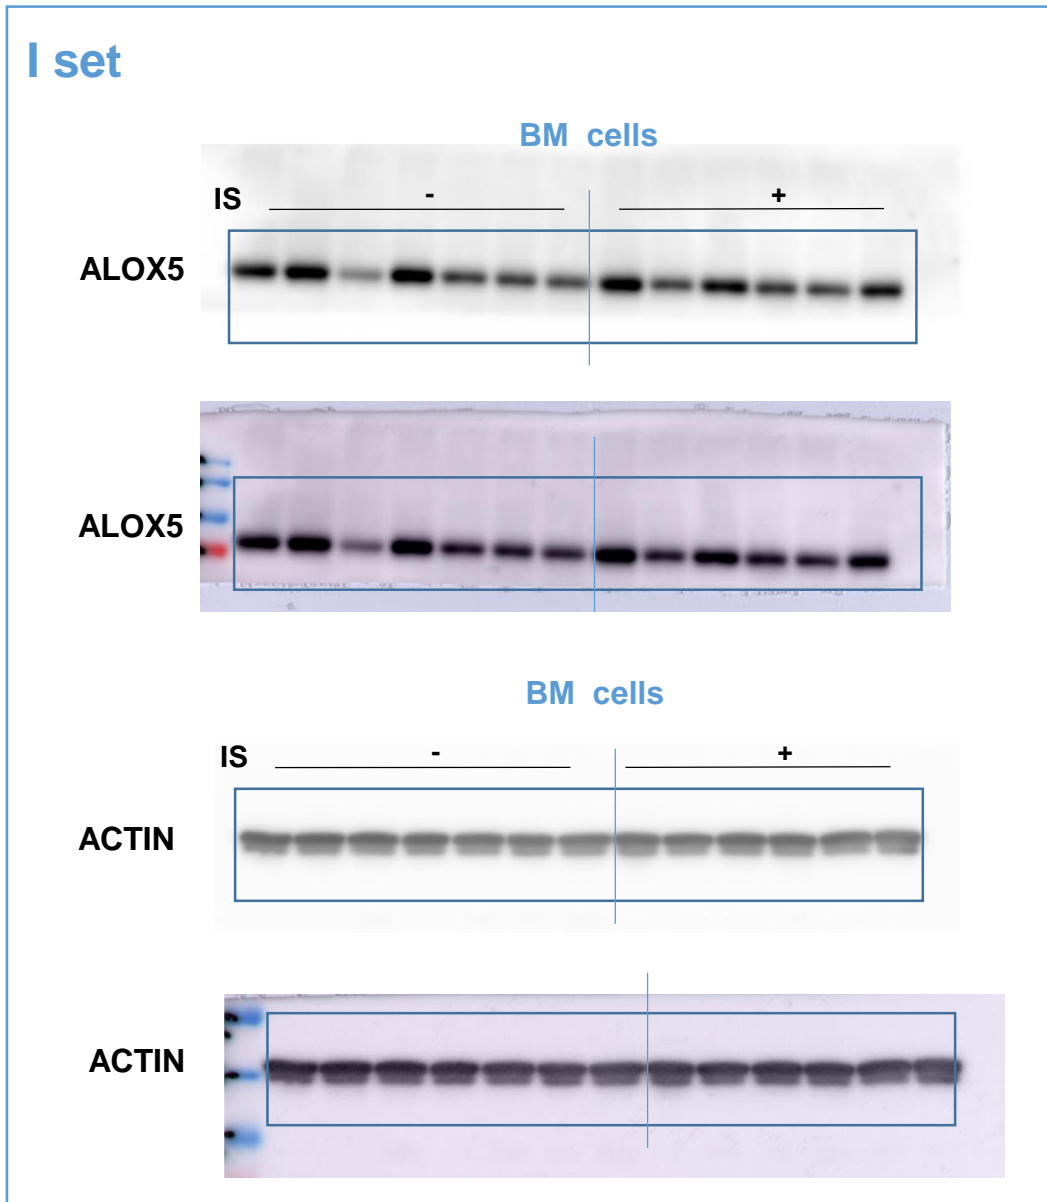

→ File name: Alox5\_BM-1.jpg  
Actin\_BM-1.jpg

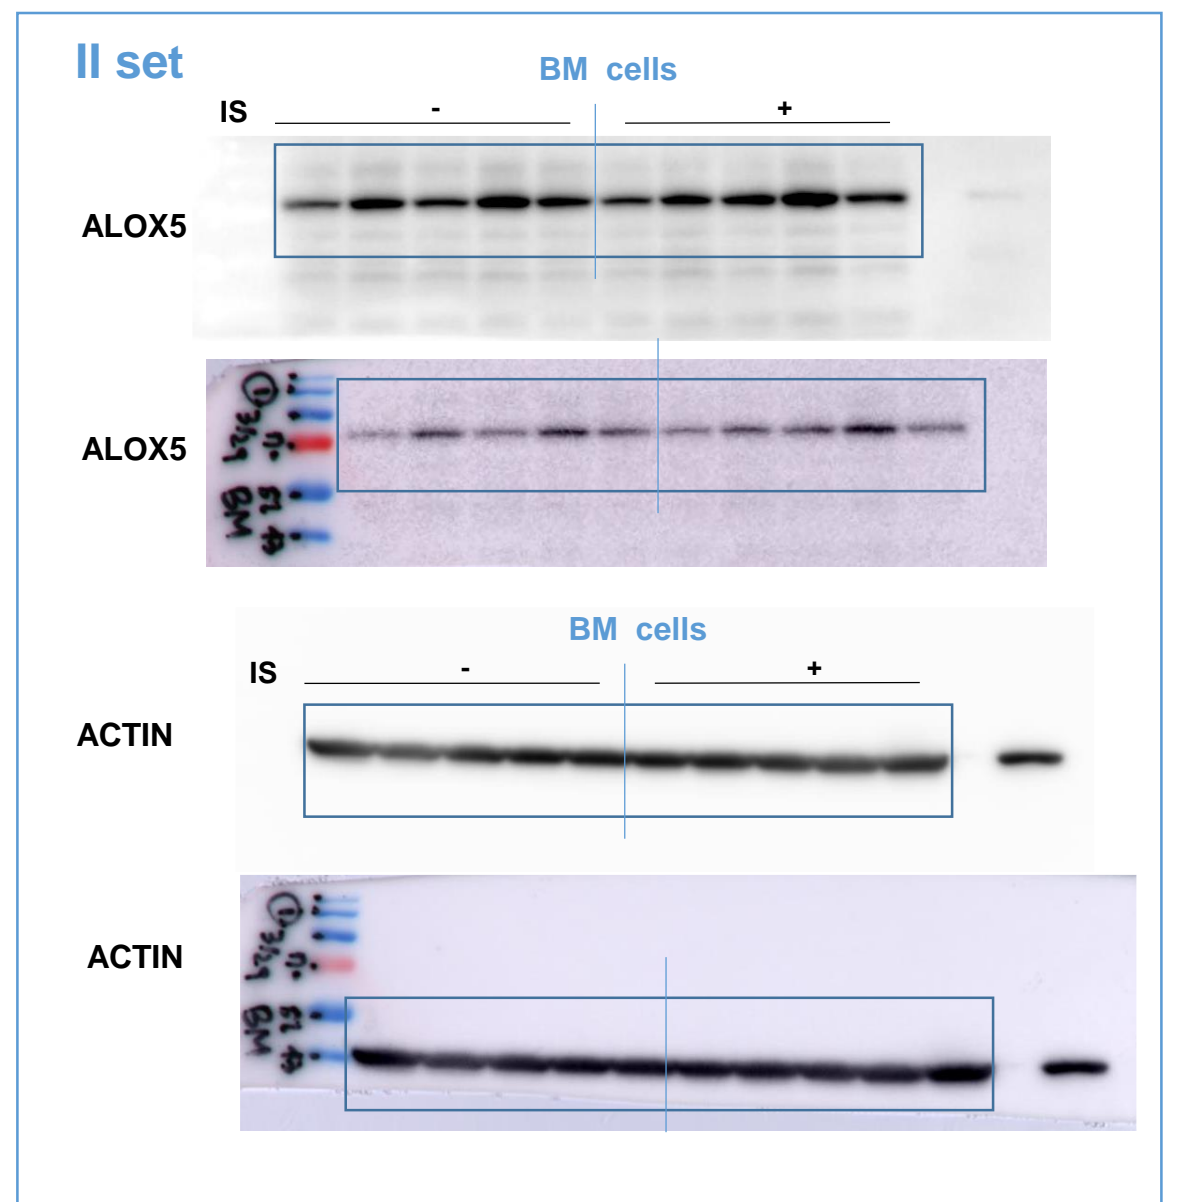

→ File name: Alox5\_BM.jpg  
Actin\_BM.jpg
