# Supplementary material for: Uremic toxin indoxyl sulfate induces trained immunity via the AhR-dependent arachidonic acid pathway in end-stage renal disease (ESRD)
Source: eLife. 2024 Jul 9;12:RP87316. doi: 10.7554/eLife.87316 (PMC11233136; doi:10.7554/eLife.87316)
Supplement: Figure 1—figure supplement 1—source data 1. [file elife-87316-fig1-figsupp1-data1.xlsx]

## Sheet: Fig. 1-sFig. 1A
	Fig. 1-sFig. 1A, TNF-α ELISA									Fig. 1-sFig. 1A, IL-6 ELISA
		con(T)	LPS10	LPS+IS 1mM(T)	LPS+PCS 1mM(T)	LPS+HA 2mM(T)	LPS+IAA 0.5mM(T)	LPS+KA 0.5mM(T)			con(T)	LPS10	LPS+IS 1mM(T)	LPS+PCS 1mM(T)	LPS+HA 2mM(T)	LPS+IAA 0.5mM(T)	LPS+KA 0.5mM(T)
1	HC2022033	87.6337	5912.84	6659.57	6405.28	6020.84	6712.81	6780.89	1	HC2022033	19.2782	3723.59	3927.39	2929.99	3388.67	3797.76	3769.72
2	HC2022031	0	4617.15	6508.16	4452.68	3504.1	3577.68	3695.72	2	HC2022031	0	2960.13	4408.32	1827.59	2231.68	2033.02	2390.81
3	HC2022037	10.5075	3589.28	5084.08	4136.04	3550.37	4048.9	3127.7	3	HC2022037	0.420542	853.204	1163.03	826.577	768.767	1047.71	857.833
4	HC2022039	19.3082	7459.44	8239.42	7378.85	5153.91	7208	6946.94	4	HC2022039	0	1584.72	1981.24	1528.66	1318.51	1600.25	1753.28
5	HC2022044	25.3545	3867.5	6474.94	3447.45	3785.45	4240.27	3750	5	HC2022044	-2.49474	1694.77	2966.59	1566.94	1593.73	1692.31	1591.46
6	HC2022045	18.4063	3834.03	5971.01	4269.89	3037.88	2981.38	4190.08	6	HC2022045	-1.28808	1166.87	1344.22	1237.41	1038.36	966.49	1003.93

## Sheet: Fig. 1-sFig. 1B
	Fig. 1-sFig. 1B, WST assay
		con	IS (T)	LPS 10ng/ml	LPS+IS(T)
1	HC2019041	0.494333	0.434667	0.480667	0.435
2	HC2019046	0.4738	0.497	0.4716	0.47625
3	HC2019083	0.542	0.561667	0.501667	0.592667

## Sheet: Fig. 1-sFig. 1C-D
	Fig. 1-sFig. 1C, TNF-α ELISA						Fig. 1-sFig. 1C, IL-6 ELISA
		con	LPS	LPS+IS(T)	LPS+KCl(T)			con	LPS	LPS+IS (T)	LPS+KCl (T)
1	HC2020143	0	1804.56	2490.99	1557.48	1	HC2020143	1.8132	2220	2753.8	2481.19
2	HC2020144	0	2536	5626.2	2528.19	2	HC2020144	0.395436	2173.25	4091.13	1558.48
3	HC2020146	0	3121.06	6416.31	3427.87	3	HC2020146	16.8095	747.033	1740.39	877.013
4	HC2021005	41.3311	2542.46	6646.75	3453.33	4	HC2021002	16.8849	485.024	608.281	423.299
5	HC2021012	45.2851	3600.91	5188.69	2805.6	5	HC2021005	0	3606.63	5283.68	3926.29
6	HC2021013	0	4405.64	5813.34	2974.81	6	HC2021012	9.75662	2051.13	2481.25	1705.56
	Fig. 1-sFig. 1D, TNF-α ELISA						Fig. 1-sFig. 1D, IL-6 ELISA
		con	LPS	LPS+IS(T)	LPS+BG(T)			con	LPS	LPS+IS(T)	LPS+BG(T)
1	HC2019066	12.1784	843.458	1181.95	1396.63	1	HC2019066	5.82693	262.468	331.649	583.238
2	HC2019075	18.1575	1351.07	3621.28	1637.49	2	HC2019078	2.49209	328.525	536.094	1636.52
3	HC2019078	8.31581	168.657	1479.89	1429.19	3	HC2019095	2.63844	228.725	287.311	576.616
4	HC2019095	8.35164	1617.36	2640.89	3354.83	4	HC2019102	2.66074	447.813	1054.34	1690.53
5	HC2019120	0.786127	159.178	665.117	1969.74	5	HC2019120	0	502.987	768.741	1783.16
6	HC2019122	3.86675	260.393	629.047	630.016	6	HC2019122	3.24171	461.485	695.332	594.707
7	HC2019138	4.35758	89.8019	1137.62	139.263

## Sheet: Fig. 1-sFig. 1E
	Fig. 1-sFig. 1E, IL-1β ELISA					Fig. 1-sFig. 1E, MCP-1 ELISA					Fig. 1-sFig. 1E, IL-10 ELISA
		con	LPS	LPS+IS(T)			con	LPS	LPS+IS(T)			con	LPS	LPS+IS(T)
1	HC2020090	4.74883	24.5929	44.731	1	HC2023073	346.746	2197.83	3524.01	1	HC2023070	22.9688	468.516	197.42
2	HC2020103	5.04614	34.9131	42.8359	2	HC2023077	107.31	1498.25	1726.96	2	HC2023071	19.8929	285.222	142.941
3	HC2020105	4.93427	8.2377	13.5967	3	HC2023080	405.962	2210.82	4759.43	3	HC2023073	15.225	611.149	229.598
4	HC2020110	10.8593	15.435	54.0956	4	HC2023123	121.939	2777.62	4780.35	4	HC2023074	11.907	272.173	96.5578
5	HC2020113	11.4798	56.652	130.858	5	HC2023124	132.984	2369.17	3990.65	5	HC2023080	16.8926	592.043	182.947
					6	HC2023125	96.4129	3051.57	4244.86	6	HC2023121	14.4857	388.264	264.826
										7	HC2023124	14.8552	401.885	270.213
