# Supplementary material for: Uremic toxin indoxyl sulfate induces trained immunity via the AhR-dependent arachidonic acid pathway in end-stage renal disease (ESRD)
Source: eLife. 2024 Jul 9;12:RP87316. doi: 10.7554/eLife.87316 (PMC11233136; doi:10.7554/eLife.87316)
Supplement: Figure 1—source data 1. [file elife-87316-fig1-data1.xlsx]

## Sheet: Fig. 1B
Fig. 1B, TNF-α ELISA
	con	IS 1 mM (T)	LPS 1 ng/ml (2nd)	IS 1 mM (T) + LPS1(2nd)	LPS 5 ng/ml (2nd)	IS 1 mM (T) + LPS5 (2nd)	LPS 10 ng/ml (2nd)	IS 1 mM (T) + LPS10 (2nd)
HC2019025	21.5096	12.6935	383.852	1740.39	694.42	3211.63	1591.88	5204.27
HC2019028	25.616	23.7882	60.071	207.825	286.256	1161.96	536.267	1901.43
HC2019031	7.98405	0.0955483	283.967	103.93	1337.4	2908.16	2068.82	5583.12
HC2019034	9.26852	5.40351	83.7942	82.4143	971.592	1079.51	1625.88	2119.3
HC2019041	0	0	105.788	187.963	390.873	990.49	734.389	2060.32
HC2019044	10.4509	7.94448	88.9106	43.7708	476.771	834.76	952.453	1844.2
HC2019046	8.62737	7.94448	7.94448	42.1082	59.2472	82.3188	375.041	836.315
Fig. 1B, IL-6 ELISA
	con	IS 1 mM (T)	LPS 1 ng/ml (2nd)	IS 1 mM (T) + LPS1(2nd)	LPS 5 ng/ml (2nd)	IS 1 mM (T) + LPS5 (2nd)	LPS 10 ng/ml (2nd)	IS 1 mM (T) + LPS10 (2nd)
HC2019025	0.617822	0	399.6	605.813	1112.01	1854.85	1904.33	3359.7
HC2019028	11.2913	10.5004	83.4358	265.253	155.09	426.822	168.056	649.808
HC2019031	2.31768	0	663.126	293.813	1055.54	1089.38	1766.88	2467.21
HC2019034	1.47604	0	35.3588	33.9352	142.293	167.342	280.925	507.736
HC2019041	3.08249	1.63298	13.932	25.0377	54.7673	95.7926	143.983	200.624
HC2019044	0.685118	0	150.13	43.2717	241.591	503.349	356.706	858.07

## Sheet: Fig. 1C-D
Fig. 1C, TNF-α ELISA
	con	LPS10	LPS+IS250(T)	LPS+IS500(T)	LPS+IS1000(T)
HC2020103	0	756.858	1785.75	1955.29	2225.21
HC2020105	0	253.578	250.356	550.498	733.12
HC2020110	24.6057	1839.68	3453.28	3518.73	4452.63
HC2020111	32.1417	2133.99	4927.33	4925.32	5247.7
HC2020113	27.3556	872.004	2383.71	3017.04	3260.34
Fig. 1C, IL-6 ELISA
	con	LPS10	LPS+IS250(T)	LPS+IS500(T)	LPS+IS1000(T)
HC2020103	0	524.111	991.299	1104.72	1166.94
HC2020105	0	220.748	223.335	357.925	368.664
HC2020110	10.272	419.913	897.702	1137.12	1751.51
HC2020111	9.63884	368.188	764.95	773.964	712.005
HC2020113	9.70145	232.572	573.744	806.745	920.291
Fig. 1D, TNF-α ELISA
	con	Pam3 10	Pam3+IS(T)
HC2020090	17.9279	2243.85	3619.91
HC2020083	24.8673	1439.16	4487.37
HC2020101	13.3247	4933.97	5475.38
HC2020103	0	1504.65	5227.7
HC2020105	0	3406.75	6154.92
HC2020110	24.6057	3443.85	2894.28
Fig. 1D, IL-6 ELISA
	con	Pam3 10	Pam3+IS(T)
HC2020103	0	3266.45	7520.16
HC2020105	0	3641.49	5203.67
HC2020110	10.272	1121.57	4419.83
HC2020113	9.70145	1004.03	4668.13
HC2020131	1.51665	5646.58	6762.3
HC2021014	3.45362	1208.65	3044.43

## Sheet: Fig. 1E
Fig. 1E, IL-1β mRNA
	con(T)	LPS10	L+IS(T)
HC2020042	1	94.7799	163.202
HC2020056	1	92.874	156.759
HC2020034	1	248.662	295.887
HC2020081	1	170.652	339.477
HC2020083	1	75.3108	95.9593
Fig. 1E, MCP-1 mRNA
	con(T)	LPS10	L+IS(T)
HC2020103	1	2.68162	6.92412
HC2020105	1	4.87966	8.83545
HC2020034	1	7.1284	6.81379
HC2020081	1	2.24197	7.64017
HC2020083	1	3.06944	4.62977
Fig. 1E, IL-10 mRNA
	con(T)	LPS10	L+IS(T)
HC2020042	1	0.837038	0.444477
HC2020047	1	0.24084	0.148127
HC2020056	1	0.188261	0.105955
HC2020083	1	1.13222	0.374459
HC2020086	1	0.593015	0.2231
HC2020105	1	0.226659	0.062389

## Sheet: Fig. 1,G-I
Fig. 1G, TNF-α ELISA				Fig. 1G, IL-6 ELISA
	LPS+30%NS(T)	LPS+30%US(T)			LPS+30%NS(T)	LPS+30%US(T)
HC2021064	2761.01	4033.44		HC2021064	1339.97	1680.39
HC2021067	4433.83	5804.76		HC2021067	1017.56	1502.8
HC2021075	6541.53	7160.74		HC2021075	2361.94	3521.36
HC2021078	5685.74	6611.21		HC2021078	2135.95	2552.67
HC2021087	3221.49	4872.13		HC2021081	1178.73	1307.33
HC2021088	3163.4	4179.13		HC2021087	1016.91	2342.9
				HC2021088	621.029	1272.13
Fig. 1H, TNF-α mRNA				Fig. 1H, IL-6 mRNA
	LPS+30%NS(T)	LPS+30%US(T)			LPS+30%NS(T)	LPS+30%US(T)
HC2021075	1	1.50435		HC2021075	1	3.14533
HC2021078	1	1.4826		HC2021078	1	2.90163
HC2021067	1	1.49947		HC2021064	1	4.44615
HC2021094	1	1.82621		HC2021094	1	3.17197
HC2021088	1	2.5087		HC2021088	1	5.76164
Fig. 1I, IL-1β mRNA				Fig. 1I, MCP-1 mRNA
	LPS+30%NS(T)	LPS+30%US(T)			LPS+30%NS(T)	LPS+30%US(T)
HC2021075	1	2.23729		HC2021075	1	2.24114
HC2021078	1	3.36388		HC2021078	1	1.91384
HC2021064	1	1.3203		HC2021064	1	1.21721
HC2021067	1	2.95449		HC2021067	1	1.21006
HC2021094	1	1.18162		HC2021087	1	2.15057
HC2021088	1	1.3864		HC2021088	1	1.6823
