# Supplementary material for: Uremic toxin indoxyl sulfate induces trained immunity via the AhR-dependent arachidonic acid pathway in end-stage renal disease (ESRD)
Source: eLife. 2024 Jul 9;12:RP87316. doi: 10.7554/eLife.87316 (PMC11233136; doi:10.7554/eLife.87316)
Supplement: Figure 2—figure supplement 1—source data 1. [file elife-87316-fig2-figsupp1-data1.xlsx]

## Sheet: Fig. 2-sFig. 1B
	Fig. 2-sFig. 1B, Glycolysis				Fig. 2-sFig. 1B, Glycolytic capacity
		LPS	LPS+IS[T]			LPS	LPS+IS[T]
	HC2019072	24.1	27.906		HC2019072	28.4233	30.386
	HC2019075	20.42	26.576		HC2019075	22.96	27.234
	HC2019078	19.762	25.246		HC2019078	18.936	22.772
	HC2019089	14.255	18.6525		HC2019089	14.86	21.4325
