# Supplementary material for: Uremic toxin indoxyl sulfate induces trained immunity via the AhR-dependent arachidonic acid pathway in end-stage renal disease (ESRD)
Source: eLife. 2024 Jul 9;12:RP87316. doi: 10.7554/eLife.87316 (PMC11233136; doi:10.7554/eLife.87316)
Supplement: Figure 2—source data 1. [file elife-87316-fig2-data1.xlsx]

## Sheet: Fig. 2B
Fig. 2B, Glycolysis				Fig. 2B, Glycolytic capacity
	Control	IS[T]			Control	IS[T]
HC2020089	10.14	24.005		HC2020089	13.5667	18.05
HC2020092	9.09333	13.4567		HC2020092	10.56	12.0533
HC2020100	18.3436	25.0293		HC2020100	17.8706	21.6014
HC2020108	8.84708	22.9555		HC2020108	12.8064	14.5412

## Sheet: Fig. 2D
Fig. 2D, Basal respiration				Fig. 2D, Maximal respiration				Fig. 2D, ATP production
	Control	IS(T)			Control	IS(T)			Control	IS(T)
HC2020095	137	147.59		HC2020095	304.37	370.61		HC2020095	124.15	133.49
HC2020100	113.25	176.43		HC2020100	264.07	377.36		HC2020100	99.5	160.33
HC2020108	79.82	191.93		HC2020108	163.78	426.31		HC2020108	66.51	174.93
HC2020111	111.44	156.76		HC2020111	227.23	535.95		HC2020111	95.39	141.84
HC2020114	60.69	164.13		HC2020114	140.52	620.62		HC2020114	53.91	147

## Sheet: Fig. 2E
Fig. 2E, TNF-α ELISA
	con	LPS 10	LPS+IS(T)	LPS+IS(T)+2DG 0.5 mM (T)	LPS+IS(T)+2DG 1 mM (T)	LPS+IS(T)+2DG 2 mM (T)
HC2021014	34.9268	4045.67	7379.56	6996.97	3739.3	4858.79
HC2021019	0	2040.06	5113.89	4269.45	3488.25	4061.19
HC2021029	21.1389	2561.98	3671.31	3799.25	2265.28	1970.38
HC2021036	0	3956.24	9489.98	9560.41	6954.04	6519.3
HC2021035	0	4403.08	6318.79	6141.62	4591.41	3791.18
Fig. 2E, IL-6 ELISA
	con	LPS 10	LPS+IS(T)	LPS+IS(T)+2DG 0.5 mM (T)	LPS+IS(T)+2DG 1 mM (T)	LPS+IS(T)+2DG 2 mM (T)
HC2021014	3.45362	1733.22	2676.25	2366.94	1646.08	1778.85
HC2021018	31.3331	1292.69	2488.89	2264.72	2487.2	1205.13
HC2021019	30.8335	1158.2	2366.1	1756.96	1346.13	983.295
HC2021029	3.3303	1223.19	1455.71	1021.12	839.934	570.241
HC2021035	1.10929	1972.84	2030.98	1544.14	1255.09	1210.03
