# Supplementary material for: Uremic toxin indoxyl sulfate induces trained immunity via the AhR-dependent arachidonic acid pathway in end-stage renal disease (ESRD)
Source: eLife. 2024 Jul 9;12:RP87316. doi: 10.7554/eLife.87316 (PMC11233136; doi:10.7554/eLife.87316)
Supplement: Figure 3—figure supplement 1—source data 1. [file elife-87316-fig3-figsupp1-data1.xlsx]

## Sheet: Fig. 3-sFig. 1B
	Fig. 3-sFig. 1B, ChIP-qPCR on TNF-α promoter						Fig. 3-sFig. 1B, ChIP-qPCR on IL-6 promoter
		H3K4m3-LPS	H3K4m3-LPS+IS(T)					H3K4m3-LPS	H3K4m3-LPS+IS(T)
	HC2023135	5.7067	7.73839				HC2023121	0.39561	0.470088
	HC2023136	4.64487	6.10434				HC2023135	1.4443	1.52679
	HC2024033	5.89319	6.07716				HC2023136	0.59638	1.2125
	HC2019089	8.97193	10.1135				HC2024032	0.970996	1.60946
	HC2019092	9.20657	11.552				HC2024033	0.600637	1.44997
	HC2019095	9.17756	11.7013				HC2023121	0.39561	0.470088

## Sheet: Fig. 3-sFIg. 1C
	Fig. 3-sFig. 1C, ChIP-qPCR on HK2promoter						Fig. 3-sFig. 1C, ChIP-qPCR on PFKP promoter
		H3K4m3-con (T)	H3K4m3-IS(T)					H3K4m3-con (T)	H3K4m3-IS(T)
1	HC2019108	2.59377	4.71336			1	HC2019108	24.2561	38.8861
2	HC2019111	1.34787	3.07784			2	HC2019111	10.1689	25.9245
3	HC2019120	1.30614	1.70115			3	HC2019120	15.3749	17.4205
4	HC2019126	1.62333	4.64886			4	HC2019126	16.2284	21.6722
5	HC2019129	0.771703	1.32719			5	HC2019129	18.7964	26.8703
