# Supplementary material for: Uremic toxin indoxyl sulfate induces trained immunity via the AhR-dependent arachidonic acid pathway in end-stage renal disease (ESRD)
Source: eLife. 2024 Jul 9;12:RP87316. doi: 10.7554/eLife.87316 (PMC11233136; doi:10.7554/eLife.87316)
Supplement: Figure 3—source data 1. [file elife-87316-fig3-data1.xlsx]

## Sheet: Fig. 3B
Fig. 3B, ChIP-qPCR on TNF-α promoter				Fig. 3B, ChIP-qPCR on IL-6 promoter
	H3K4m3-con (T)	H3K4m3-IS(T)			H3K4m3-con (T)	H3K4m3-IS(T)
HC2020072	6.90971	8.38028		HC2020072	6.39401	7.99207
HC2020075	7.69922	9.26748		HC2020075	7.69922	9.26748
HC2020078	6.52538	9.08214		HC2020078	3.92631	4.69363
HC2020059	3.04122	7.74521		HC2020059	6.48271	7.65743
HC2020066	1.91551	5.13684		HC2020081	2.68629	3.65857
HC2020081	3.72487	4.88034		HC2020083	2.88343	3.73358
HC2020083	4.19932	4.43159

## Sheet: Fig. 3C
Fig. 3C, TNF-α ELISA						Fig. 3C, IL-6 ELISA
	con	LPS	LPS+IS (T)	LPS+IS(T)+MTA 200 μM (T)			con	LPS	LPS+IS (T)	LPS+IS(T)+MTA 200 μM (T)
HC2021006	30.5927	3873.11	5154.17	3602.45		HC2021006	5.31165	2384.45	3501.06	2729.48
HC2021007	41.8996	2086.38	3764.72	2077.87		HC2021007	22.8815	2066.98	3092.48	2087.69
HC2021013	0	4405.64	5813.34	1875.45		HC2021010	2.51563	2556.9	3860.49	3238.38
HC2021014	34.9268	4045.67	7379.56	4954.44		HC2021014	3.45362	1733.22	2676.25	2526.75
HC2021016	0	1528.42	4071.07	1840.1		HC2021016	0	1708.43	3200.62	2339.3

## Sheet: Fig. 3D
Fig. 3D, ChIP-qPCR on TNF-α promoter					Fig. 3D, ChIP-qPCR on IL-6 promoter
	H3m3-con	H3m3-IS(T)	H3m3-IS(T)+2DG(T)			H3m3-con	H3m3-IS(T)	H3m3-IS(T)+2DG(T)
HC2023122	1.96255	3.07551	1.3443		HC2023122	0.381563	0.652741	0.343395
HC2023136	5.28927	8.65626	7.02307		HC2023136	0.540406	0.709449	0.484105
HC2024012	5.99192	8.26307	5.42094		HC2024012	0.466414	0.814974	0.481842
HC2024010	4.86141	7.68488	5.82825		HC2024010	0.679518	0.974774	0.41419
