# Supplementary material for: Uremic toxin indoxyl sulfate induces trained immunity via the AhR-dependent arachidonic acid pathway in end-stage renal disease (ESRD)
Source: eLife. 2024 Jul 9;12:RP87316. doi: 10.7554/eLife.87316 (PMC11233136; doi:10.7554/eLife.87316)
Supplement: Figure 4—figure supplement 1—source data 1. [file elife-87316-fig4-figsupp1-data1.xlsx]

## Sheet: Fig. 4-sFig. 1A
	Fig. 4-sFig. 1A, TNF-α ELISA						Fig. 4-sFig. 1A, IL-6 ELISA
		con(T)	LPS	LPS+FICZ(T)				con(T)	LPS	LPS+FICZ(T)
1	HC2020083	24.8673	1647.4	2891.3		1	HC2020101	0	538.421	626.024
2	HC2020090	17.9279	999.135	1094.08		2	HC2020105	0	220.748	328.371
3	HC2020101	13.3247	2131.87	2459.41		3	HC2020110	10.272	419.913	596.761
4	HC2020103	0	756.858	828.845		4	HC2020128	0	1240.22	1350.01
5	HC2020105	0	253.578	359.521		5	HC2021014	3.45362	1733.22	2108.73
6	HC2020110	24.6057	1839.68	2665.41		6	HC2021064	0	1765.88	2674.98
7	HC2020113	27.3556	872.004	1371.45		7	HC2021067	16.3	1653.23	2619.84
8	HC2021064	16.43	3620.67	4756.54
9	HC2021067	43.38	4853.32	6319.28

## Sheet: Fig. 4-sFig. 1B
	Fig. 4-sFig. 1B, Glycolysis					Fig. 4-sFig. 1B, Glycolytic capacity
		Control	IS[T]	IS(T)+GNF			Control	IS[T]	IS(T)+GNF
	HC2020089	10.14	24.005	22.05		HC2020089	13.5667	18.05	18.52
	HC2020092	9.09333	13.4567	13.7467		HC2020092	10.56	12.0533	13.08
	HC2020100	18.3436	25.0293	28.089		HC2020100	17.8706	21.6014	24.7683
	HC2020108	8.84708	22.9555	18.7857		HC2020108	12.8064	14.5412	17.8099

## Sheet: Fig. 4-sFig. 1C
	Fig. 4-sFig. 1C, Basal respiration					Fig. 4-sFig. 1C, Maximal respiration					Fig. 4-sFig. 1C, ATP production
		Control	IS[T]	IS(T)+GNF			Control	IS[T]	IS(T)+GNF			Control	IS[T]	IS(T)+GNF
	HC2020095	137	147.59	172.37		HC2020095	304.37	370.61	408.66		HC2020095	124.15	133.49	159.62
	HC2020100	113.25	176.43	168		HC2020100	264.07	377.36	294.91		HC2020100	99.5	160.33	153.92
	HC2020108	79.82	191.93	230.37		HC2020108	163.78	426.31	459.39		HC2020108	66.51	174.93	205.01
	HC2020111	111.44	156.76	192.61		HC2020111	227.23	535.95	538.25		HC2020111	95.39	141.84	168.71
	HC2020114	60.69	164.13	160.66		HC2020114	140.52	620.62	377.3		HC2020114	53.91	147	138.03

## Sheet: Fig. 4-sFig. 1D
	Fig. 4-sFig. 1D, WB
	Fig. 4-sFig. 1D, right graph
	p-S6K/ACTIN
		1d_con (T)	1d_IS (T)	1d_IS (T)+G(T)
	HC2022039	0.517703	0.987427	0.845441
	HC2022043	0.508593	0.69936	0.68414
	HC2022044	0.643308	0.788097	0.938787
	HC2022045	0.60415	0.796438	0.640305
	HC2022046	0.374193	0.894042	0.903363
