# Supplementary material for: Uremic toxin indoxyl sulfate induces trained immunity via the AhR-dependent arachidonic acid pathway in end-stage renal disease (ESRD)
Source: eLife. 2024 Jul 9;12:RP87316. doi: 10.7554/eLife.87316 (PMC11233136; doi:10.7554/eLife.87316)
Supplement: Figure 4—source data 1. [file elife-87316-fig4-data1.xlsx]

## Sheet: Fig.4A
	Figure 4A, right
	AhR/ACTIN
		6d-con(T)_NE	6d-IS(T)_NE	6d-IS(T)+GNF_NE
1	HC2023082	1.41633	1.71743	0.600374
2	HC2023087	0.522759	1.49759	0.990185
3	HC2023088	0.749908	0.856763	0.687869
4	HC2023090	0.526216	0.819987	0.403206
5	HC2023094	0.596146	1.10557	0.418151

## Sheet: Fig. 4B
	Fig. 4B, TNF-α ELISA							Fig. 4B, IL-6 ELISA
		con	LPS10	LPS+IS(T)	LPS+IS(T)+GNF				con	LPS10	LPS+IS(T)	LPS+IS(T)+GNF
1	HC2020103	0	756.858	2225.21	1134.64		1	HC2020103	0	524.111	1166.94	946.903
2	HC2020105	0	253.578	733.12	267.558		2	HC2020110	10.272	419.913	1751.51	1048.24
3	HC2020110	24.6057	1839.68	4452.63	2295.79		3	HC2020101	0	538.421	607.231	188.725
4	HC2020101	13.3247	2131.87	2737.47	456.681		4	HC2020131	1.51665	3343.58	4195.13	2492.2
5	HC2021012	45.2851	3600.91	5188.69	3011.62		5	HC2021002	16.8849	485.024	608.281	311.674
6	HC2021005	41.3311	2542.46	6646.75	5593.83		6	HC2020128	0	1240.22	1383.74	1110.21
7	HC2021013	0	4405.64	5813.34	4697.49		7	HC2021012	9.75662	2051.13	2481.25	1957.58
8	HC2021014	34.9268	4045.67	7379.56	2731.79		8	HC2021014	3.45362	1733.22	2676.25	1986.37

## Sheet: Fig. 4, C-D
	Fig. 4C, TNF-α mRNA							Fig. 4C, IL-6 mRNA
		con	LPS10	LPS+IS(T)	LPS+IS(T)+GNF				con	LPS10	LPS+IS(T)	LPS+IS(T)+GNF
1	HC2020042	1	1.13567	2.59677	1.93274		1	HC2020083	0.165152	1	3.81863	2.33021
2	HC2020047	1	2.16474	2.99597	1.7469		2	HC2020086	0.012401	1	1.65203	0.673381
3	HC2020056	1	1.17563	1.67902	0.38614		3	HC2020090	0.024374	1	9.48507	6.85451
4	HC2020032	1	2.31655	5.52171	4.78992		4	HC2020103	0.169834	1	3.2781	2.96224
5	HC2020081	1	2.96353	5.33404	3.83439		5	HC2020105	0.186868	1	5.80073	4.24134
6	HC2020083	1	2.46923	3.77662	2.56432		6	HC2021012	0.00246	1	4.27514	3.4867
							7	HC2021013	0.002365	1	2.15137	1.46026
	Fig. 4D, IL-1β mRNA							Fig. 4D, MCP-1 mRNA							Fig. 4D, IL-10 mRNA
		con	LPS10	LPS+IS(T)	LPS+IS(T)+GNF				con	LPS10	LPS+IS(T)	LPS+IS(T)+GNF				con	LPS10	LPS+IS(T)	LPS+IS(T)+GNF
1	HC2020042	1	94.7799	163.202	126.418		1	HC2020103	1	2.68162	6.92412	1.26435		1	HC2020042	1	0.837038	0.444477	1.00573
2	HC2020056	1	92.874	156.759	23.8902		2	HC2020105	1	4.87966	8.83545	4.47646		2	HC2020047	1	0.24084	0.148127	0.244409
3	HC2020034	1	248.662	295.887	207.005		3	HC2020034	1	7.1284	6.81379	3.87724		3	HC2020056	1	0.188261	0.105955	0.321712
4	HC2020081	1	170.652	339.477	156.53		4	HC2020081	1	2.24197	7.64017	4.45501		4	HC2020083	1	1.13222	0.374459	0.684925
5	HC2020083	1	75.3108	95.9593	58.4634		5	HC2020083	1	3.06944	4.62977	3.67038		5	HC2020086	1	0.593015	0.2231	0.69152
														6	HC2020090	1	0.491495	0.192697	0.08104
														7	HC2020105	1	0.226659	0.062389	0.107664

## Sheet: Fig. 4E
	Fig. 4E, TNF-α mRNA							Fig. 4E, IL-6 mRNA
		siNC_LPS	siNC_LPS+IS	siAhr_LPS	siAhr_LPS+IS				siNC_LPS	siNC_LPS+IS	siAhr_LPS	siAhr_LPS+IS
1	HC2023143	1	5.45425	3.42399	2.54549		1	HC2023144	1	2.97702	1.17051	1.0916
2	HC2023134	1	1.30531	1.52531	1.50751		2	HC2023134	1	1.29545	0.954851	1.67554
3	HC2023144	1	2.35556	1.8574	1.28342		3	HC2024005	1	2.34995	0.534804	1.36721
4	HC2024005	1	3.46719	1.32763	2.115		4	HC2024023	1	2.076	0.27	0.3221
5	HC2024023	1	4.0142	0.5408	0.4939		5	HC2024032	1	1.2448	0.3849	0.5667
6	HC2024032	1	1.5829	0.3387	0.5951

## Sheet: Fig. 4F
	Fig. 4F, ChIP-qPCR on TNF-α promoter						Fig. 4F, ChIP-qPCR on IL-6 promoter
		H3K4m3-con (T)	H3K4m3-IS(T)	H3K4m3-IS(T)+GNF10				H3K4m3-con (T)	H3K4m3-IS(T)	H3K4m3-IS(T)+GNF10
1	HC2020059	3.04122	7.74521	6.52075		1	HC2020083	2.88343	3.73358	2.8044
2	HC2020066	1.91551	5.13684	3.54884		2	HC2021027	0.373829	0.539515	0.507528
3	HC2020081	3.72487	4.88034	4.52064		3	HC2021036	1.28946	2.5486	1.369
4	HC2020114	2.23504	4.52252	2.36326		4	HC2021044	1.43876	4.35477	2.3632
5	HC2021027	1.56784	2.02411	1.80264		5	HC2021111	0.575989	1.23854	0.870735
						6	HC2022026	1.80897	3.75791	3.27718
