# Supplementary material for: Uremic toxin indoxyl sulfate induces trained immunity via the AhR-dependent arachidonic acid pathway in end-stage renal disease (ESRD)
Source: eLife. 2024 Jul 9;12:RP87316. doi: 10.7554/eLife.87316 (PMC11233136; doi:10.7554/eLife.87316)
Supplement: Figure 5—figure supplement 1—source data 1. [file elife-87316-fig5-figsupp1-data1.xlsx]

## Sheet: Fig. 5-sFig. 1C
	Fig. 5-sFig. 1C, ALOX5 mRNA						Fig. 5-sFig. 1C, ALOX5AP mRNA
		6d_con (T)	6d_IS(T)	6d_FICZ(T)	6d_KA(T)			6d_con (T)	6d_IS(T)	6d_FICZ(T)	6d_KA(T)
	HC2023073	1	1.51838	1.93893	2.01155		HC2023073	1	2.57848	2.32297	1.5781
	HC2023074	1	2.86656	2.47648	1.44345		HC2023074	1	1.49281	1.59428	0.217898
	HC2023077	1	1.78491	2.45081	0.590222		HC2023077	1	3.82356	6.10525	2.09087
	HC2023080	1	3.68967	3.17872	1.54437		HC2023080	1	3.27336	2.80424	1.81736
	HC2023084	1	3.54622	2.71161	2.0509		HC2023084	1	6.61854	4.18619	2.95416

## Sheet: Fig. 5-sFig. 1D
	Fig. 5-sFig. 1D, Heat map
		IS-trained macrophages/non-trained macrophages	ESRD/HC
	ALOX5	1.25538	4.07675
	ALOX5AP	1.88216	-0.242987
	LTB4R	0.659817	1.24766
	CYP1B1	1.00342	3.20511

## Sheet: Fig. 5-sFig. 1F
	Fig. 5-sFig. 1F, TNF-α ELISA						Fig. 5-sFig. 1F, IL-6 ELISA
		con	LPS	LPS+IS(T)	LPS+IS(T)+U75302 5μM(T)			con	LPS	LPS+IS(T)	LPS+IS(T)+U75302 5μM(T)
1	HC2021048	0	2270.82	2567.21	1570.62	1	HC2021048	0	805.732	887.024	493.224
2	HC2021061	32.72	4512.18	7872.56	3059.17	2	HC2021061	5.15	2585.82	3777.15	833.67
3	HC2021064	16.43	3620.67	7033.51	5201.25	3	HC2021064	0	1765.88	3040.78	2733.34
4	HC2021067	0	4853.32	9020.68	8811.93	4	HC2021071	13.73	666.54	1216.93	868.25
5	HC2021071	29.82	5093.09	9308.12	5927.72	5	HC2021075	8.38	2591.34	4660.15	2176.95
6	HC2021075	0	8810.63	12918.3	4610.32	6	HC2021081	1.45	1116.98	2960.99	1556.27
7	HC2021078	19.04	8382.05	14652.9	12309.8
8	HC2021081	22.28	5054.98	10630.3	5822.86

## Sheet: Fig. 5-sFig. 1H
	Fig. 5-sFig. 1H, ALOX5 mRNA					Fig. 5-sFig. 1H, TNF-α mRNA						Fig. 5-sFig. 1H, IL-6 mRNA
		siNC_1d	siALOX5_1d				siNC_LPS	siNC_LPS+IS(T)	siALOX5_LPS	siALOX5_LPS+IS(T)			siNC_LPS	siNC_LPS+IS(T)	siALOX5_LPS	siALOX5_LPS+IS(T)
	HC2023143	1	0.612029			HC2023134	1	1.30531	1	1.12333		HC2023144	1	2.97702	1	1.28171
	HC2023144	1	0.548887			HC2023144	1	2.35556	1	0.485678		HC2023134	1	1.29545	1	1.54418
	HC2024015	1	0.780197			HC20240015	1	1.21426	1	0.70372		HC2024005	1	2.34995	1	2.68861
	HC2024023	1	0.4924			HC2024037	1	1.3816	1	0.907		HC2024032	1	1.24481	1	0.834655
						HC2024045	1	2.9799	1	1.2261		HC2024045	1	1.9453	1	1.2272
						HC2024046	1	1.5197	1	0.902		HC2024046	1	1.1494	1	0.7727

## Sheet: Fig. 5-sFig. 1I
	Fig. 5-sFig. 1I, WB
	Fig. 5-sFig. 1I, WB
	p-S6K/ACTIN
		1d-con	1d-IS	1d-IS+ZLT
1	HC2024000	0.333137	0.592113	0.646276
2	HC2024037	0.477664	0.684073	0.648441
3	HC2024045	0.414375	0.673746	0.722915
4	HC2024046	0.443361	0.640745	0.685687

## Sheet: Fig. 5-sFig. 1J
	Fig. 5-sFig. 1J, ALOX5 mRNA					Fig. 5-sFig. 1J, ALOX5AP mRNA					Fig. 5-sFig. 1J, LTB4R1 mRNA
		LPS+30%NS(T)	LPS+30%US(T)				LPS+30%NS(T)	LPS+30%US(T)				LPS+30%NS(T)	LPS+30%US(T)
	HC2021078	1	1.4238			HC2021075	1	2.22673			HC2021075	1	2.91822
	HC2021064	1	1.58024			HC2021078	1	3.83917			HC2021078	1	1.66538
	HC2021081	1	1.57064			HC2021064	1	2.24779			HC2021064	1	1.80955
	HC2021087	1	2.24758			HC2021067	1	4.45524			HC2021067	1	3.06143
	HC2021088	1	1.28611			HC2021088	1	3.45957			HC2021088	1	2.69758
