# Supplementary material for: Uremic toxin indoxyl sulfate induces trained immunity via the AhR-dependent arachidonic acid pathway in end-stage renal disease (ESRD)
Source: eLife. 2024 Jul 9;12:RP87316. doi: 10.7554/eLife.87316 (PMC11233136; doi:10.7554/eLife.87316)
Supplement: Figure 5—figure supplement 2—source data 1. [file elife-87316-fig5-figsupp2-data1.xlsx]

## Sheet: Fig. 5-sFig. 2B
	Fig. 5-sFig. 2B, KDM5A mRNA				Fig. 5-sFig. 2B, KDM5B mRNA				Fig. 5-sFig. 2B, KDM5C mRNA				Fig. 5-sFig. 2B, SETDB2 mRNA				Fig. 5-sFig. 2B, SETD7 mRNA				Fig. 5-sFig. 2B, SETD3 mRNA
		6d_con(T)	6d_IS(T)			6d_con(T)	6d_IS(T)			6d_con(T)	6d_IS(T)			6d_con(T)	6d_IS(T)			6d_con(T)	6d_IS(T)			6d_con(T)	6d_IS(T)
	HC2020047	1	1.14806		HC2020047	1	1.47362		HC2020047	1	1.02103		HC2020047	1	1.30372		HC2022031	1	1.16197		HC2020047	1	0.827142
	HC2020001	1	1.17856		HC2020001	1	1.44787		HC2020001	1	1.04342		HC2020001	1	1.13171		HC2022033	1	1.03208		HC2020001	1	1.12964
	HC2019138	1	0.866445		HC2019138	1	1.15596		HC2019138	1	0.810406		HC2019138	1	0.891748		HC2022037	1	0.941368		HC2019138	1	1.17789
	HC2019122	1	1.34168		HC2019122	1	0.950697						HC2019122	1	0.891026		HC2022039	1	1.08186
	HC2019129	1	0.947863		HC2019129	1	1.18339						HC2019129	1	0.839351

## Sheet: Fig. 5-sFig. 2C
	Fig. 5-sFig. 2C, ALOX5 mRNA					Fig. 5-sFig. 2C, ALOX5AP mRNA					Fig. 5-sFig. 2C, LTB4R1 mRNA
		con(T)	IS(T)	IS(T)+MTA(T)			con(T)	IS(T)	IS(T)+MTA(T)			con(T)	IS(T)	IS(T)+MTA(T)
	HC2021101	1	8.58081	6.38383		HC2021103	1	4.33108	3.79157		HC2021101	1	1.70989	1.0467
	HC2021103	1	2.87082	1.79736		HC2021107	1	8.25709	6.28682		HC2021105	1	1.50191	1.00573
	HC2021107	1	5.8539	4.13528		HC2021110	1	3.41434	2.78771		HC2021107	1	1.94622	1.06346
	HC2021111	1	4.28501	3.68795		HC2021111	1	7.09107	5.8215		HC2021115	1	3.36608	1.59192
	HC2021116	1	8.40153	6.16568							HC2021118	1	1.59885	0.464626
