# Supplementary material for: Uremic toxin indoxyl sulfate induces trained immunity via the AhR-dependent arachidonic acid pathway in end-stage renal disease (ESRD)
Source: eLife. 2024 Jul 9;12:RP87316. doi: 10.7554/eLife.87316 (PMC11233136; doi:10.7554/eLife.87316)
Supplement: Figure 5—source data 1. [file elife-87316-fig5-data1.xlsx]

## Sheet: Fig. 5E
	Fig. 5E, ALOX5 mRNA					Fig. 5E, ALOX5AP mRNA					Fig. 5E, CYP1B1mRNA					Fig. 5E, LTB4R1mRNA
		con(T)	IS(T)	IS+G(T)			con(T)	IS(T)	IS+G(T)			con(T)	IS(T)	IS+G(T)			con(T)	IS(T)	IS+G(T)
1	HC2020056	1	5.90196	0.77856	1	HC2020056	1	4.70133	0.882562	1	HC2020000	1	2.54178	1.19791	1	HC2020143	1	2.86303	0.755655
2	HC2020059	1	4.20637	3.29262	2	HC2020059	1	5.50278	3.9092	2	HC2020059	1	2.73684	1.54786	2	HC2020144	1	2.29295	1.35147
3	HC2020134	1	3.28103	1.17313	3	HC2020069	1	6.34199	1.50592	3	HC2020131	1	2.13447	1.61095	3	HC2020150	1	1.79367	0.878775
4	HC2020144	1	3.51268	1.88197	4	HC2020140	1	5.90594	1.39518	4	HC2020137	1	4.55545	1.95319	4	HC2020137	1	2.00323	1.09305
5	HC2021002	1	3.69313	1.60346	5	HC2021002	1	2.61332	0.814809	5	HC2020140	1	4.63254	2.16666	5	HC2020140	1	3.71388	1.25239
6	HC2021010	1	2.86299	1.62319	6	HC2021010	1	7.63655	2.70831	6	HC2021002	1	2.45719	1.52801	6	HC2021010	1	4.46661	3.02462

## Sheet: Fig. 5F
	Figure 5F
	Figure 5F, right graph
	ALOX5/ACTIN						ALOX5AP/ACTIN
		6d_con (T)	6d_IS (T)	6d_IS (T)+G(T)				6d_con (T)	6d_IS (T)	6d_IS (T)+G(T)
1	HC2020150	0.555437	0.929491	0.818624		1	HC2020150	0.476037	0.813517	0.489515
2	HC2021103	0.622467	0.956253	0.892865		2	HC2021103	0.553394	0.657748	0.477718
3	HC2021109	0.23244	0.381729	0.281242		3	HC2021109	0.488876	0.752522	0.425245
4	HC2022041	0.317969	0.694782	0.344474		4	HC2022041	1.17556	1.35231	0.99905
5	HC2020137	0.384874	1.2623	0.846475		5	HC2020137	0.938129	1.11437	0.376999

## Sheet: Fig. 5G
	Fig. 5G, ALOX5 mRNA						Fig. 5G, ALOX5AP mRNA						Fig. 5G, LTB4R1 mRNA
		siNC	siNC_IS(T)	siAhR	siAhR_IS(T)			siNC	siNC_IS(T)	siAhR	siAhR_IS(T)			siNC	siNC_IS(T)	siAhR	siAhR_IS(T)
1	HC2023143	1	2.57281	1.24297	1.43518	1	HC2023143	1	1.37319	1.04865	1.13411	1	HC2023143	1	1.60115	0.961643	1.11143
2	HC2024015	1	1.51031	0.512735	0.42823	2	HC2023144	1	1.19383	1.05718	0.836819	2	HC2023144	1	1.30454	0.895126	0.728359
3	HC2024022	1	1.6402	0.6439	0.6188	3	HC2024015	1	1.63234	0.974491	0.796545	3	HC2024005	1	1.75748	0.875807	1.29784
4	HC2024023	1	1.5747	0.8938	0.9922	4	HC2024023	1	1.9366	0.7466	0.7207	4	HC2024015	1	1.20233	0.770761	0.698504
5	HC2024032	1	1.9395	0.5328	1.5662	5	HC2024032	1	2.0899	1.2234	1.6928

## Sheet: Fig. 5, H-I
	Fig. 5H, TNF-α ELISA						Fig. 5H, IL-6 ELISA
		con	LPS10	LPS+IS(T)	LPS+IS(T)+Zt 100 μM (T)			con	LPS10	LPS+IS(T)	LPS+IS(T)+Zt 100 μM (T)
1	HC2020127	0	7808.86	17822.2	8851.01	1	HC2020127	0	1835.24	4606.29	2340.85
2	HC2020131	8.04056	11129.4	13960	11957.1	2	HC2020131	0	3587.18	5169.06	4376.85
3	HC2020134	7.69274	3272.29	11791.7	5428.98	3	HC2020134	0	1189.87	4135.6	2984.59
4	HC2020137	48.104	7324.59	13989.7	11073.3	4	HC2020137	0.342502	4714.87	10268.1	7166.34
5	HC2020140	37.5287	3440.28	7457.34	5774.7	5	HC2020140	3.75111	1810.48	3915.58	3625.08
	Fig. 5I, ChIP-qPCR on TNF-α promoter						Fig. 5I, ChIP-qPCR on IL-6 promoter
		H3K4m3-con (T)	H3K4m3-IS(T)	H3K4m3-IS(T)+Znt				H3K4m3-con (T)	H3K4m3-IS(T)	H3K4m3-IS(T)+Znt
1	HC2021036	1.77933	4.12721	3.84006		1	HC2021027	0.373829	0.539515	0.515642
2	HC2023122	1.96255	3.07551	1.15413		2	HC2023122	0.381563	0.652741	0.224317
3	HC2023129+130	2.01877	2.78986	1.43583		3	HC2023129+130	0.415502	0.438491	0.245934
4	HC2023136	5.28927	8.65626	4.60813		4	HC2023136	0.540406	0.709449	0.156194
5	HC2024012	5.99192	8.26307	6.78837		5	HC2024012	0.466414	0.814974	0.340223
6	HC2024010	4.86141	7.68488	6.77815		6	HC2024010	0.679518	0.974774	0.321699

## Sheet: Fig. 5J
	Fig. 5J, ALOX5 mRNA					Fig. 5J, ALOX5AP mRNA					Fig. 5J, LTB4R1 mRNA
		6d-30% NS (T)	6d-30% US (T)				6d-30% NS (T)	6d-30% US (T)				6d-30% NS (T)	6d-30% US (T)
1	HC2021081	1	1.63816		1	HC2021081	1	1.87824		1	HC2021081	1	1.30064
2	HC2021088	1	1.34328		2	HC2021087	1	2.05509		2	HC2021087	1	2.23778
3	HC2021094	1	1.52306		3	HC2021088	1	1.5455		3	HC2021094	1	2.08363
4	HC2021095	1	1.66802		4	HC2021095	1	2.61568		4	HC2021095	1	2.33472
5	HC2021000	1	1.17265		5	HC2021000	1	1.20269		5	HC2021000	1	4.1114
