# Supplementary material for: Uremic toxin indoxyl sulfate induces trained immunity via the AhR-dependent arachidonic acid pathway in end-stage renal disease (ESRD)
Source: eLife. 2024 Jul 9;12:RP87316. doi: 10.7554/eLife.87316 (PMC11233136; doi:10.7554/eLife.87316)
Supplement: Figure 6—figure supplement 1—source data 1. [file elife-87316-fig6-figsupp1-data1.xlsx]

## Sheet: Fig. 6-sFig. 1B
	Fig. 6-sFig. 1B, TNF-α ELISA
		HCs_CD14+ mo
	LPS 0 ng/ml	4.1126	14.9653	12.1065	8.10758	40.209	20.29	39.9333	12.4426	178.734	39.9333	12.0702
	LPS 1 ng/ml	43.5493	14.5508	12.2158	4.90461	26.8147	19.9514	40.4347	24.5957	207.674	46.5108	11.1484
	LPS 5 ng/ml	0	17.5212	9.40601	5.13322	31.5142	60.3509	68.7391	27.8517	230.213	58.4895	24.1477
	LPS 10 ng/ml	1552.57	1037.69	1563.57	1581.94	2083.56	758.144	632.949	176.515	2894.92	705.057	293.555
		ESRDs_CD14+ mo
	LPS 0 ng/ml	1.83153	4.1126	4.1126	1.83153	1.83153	9.4661	45.2734	14.6797	11.3256	11.3256
	LPS 1 ng/ml	122.043	34.0894	1.48532	1.48532	0	13.9258	40.4347	15.3152	9.76089	10.2235
	LPS 5 ng/ml	3118.92	2451.87	220.439	54.5732	58.5494	80.8694	30.63	23.2224	28.7772	34.3376
	LPS 10 ng/ml	4094.4	4171.01	4328.83	689.986	4672.88	1727.17	3183.9	2778.93	1033.46	565.935
	Fig. 6-sFig. 1B, IL-6 ELISA
		HCs_CD14+ mo
	LPS 0 ng/ml	97.8315	104.192	388.988	533.67	721.303	963.742	1485.35	136.076	1660.1	1356.5	151.744
	LPS 1 ng/ml	640.892	113.612	502.963	1052.32	1534.98	1105.51	1694.34	378.158	1844.75	1299.06	138.515
	LPS 5 ng/ml	219.104	248.279	788.617	1238.86	3046.64	2940.57	2142.36	99.6619	2587.1	1561.96	89.7392
	LPS 10 ng/ml	58297.2	31268.6	64174.6	85628.9	66241.2	52967.1	48910	26351.7	38129.2	57658.3	49537.6
		ESRDs_CD14+ mo
	LPS 0 ng/ml	8.18677	19.3453	15.6226	23.2383	17.5259	26.5596	61.9488	3.80348	447.822	184.517
	LPS 1 ng/ml	3222.06	3119.84	147.116	168.838	108.739	159.709	0	0	636.891	155.351
	LPS 5 ng/ml	35249.8	31723.4	15666.8	6445.48	12870.5	10395.6	0	0.75906	1570.99	182.633
	LPS 10 ng/ml	85640.7	94053.6	64518.7	41885.6	85105.5	56713.5	89696.5	30409.7	81240.7	26955.4

## Sheet: Fig. 6-sFig. 1C
	Fig. 6-sFig. 1C, IL-1β mRNA					Fig. 6-sFig. 1C, MCP-1 mRNA
		HCs_7d_LPS	ESRDs_7d_LPS				HCs_7d_LPS	ESRDs_7d_LPS
	HC2022053	222.939				HC2022053	12.8515
	HC2022054	79.6824				HC2022054	4.02691
	HC2022057	198.128				HC2022057	3.39261
	HC2022058	196.557				HC2022058	4.34104
	HC2022059	26.2655				HC2022059	2.84511
	HC2022060	173.947				HC2022060	5.99918
	HC2022061	54.7721				HC2022061	3.59235
	HC2022062	80.2167				HC2022062	21.8648
	HC2022064	14.3283				HC2022064	4.39067
	HC2022065	122.006				HC2022065	10.7127
	HC2022066	128.645				HC2022066	60.5751
	ES(Y)2022001		1126.92			ES(Y)2022001		34.6368
	ES(Y)2022002		389.47			ES(Y)2022002		24.3127
	ES(Y)2022003		27.6758			ES(Y)2022003		12.556
	ES(Y)2022004		2900.26			ES(Y)2022004		12.3396
	ES(Y)2022005		3474.36			ES(Y)2022005		20.2853
	ES(Y)2022006		1570.57			ES(Y)2022006		33.1272
	ES(Y)2022007		200.801			ES(Y)2022007		6.90421
	ES(Y)2022008		372.674			ES(Y)2022008		10.4121
	ES(Y)2022009		1247.92			ES(Y)2022009		14.3396
	ES(Y)2022010		283.418			ES(Y)2022010		9.29364

## Sheet: Fig. 6-sFig. 1D
	Fig. 6-sFig. 1D, mTNF-α ELISA (ex vivo, BMDMs)					Fig. 6-sFig. 1D, mIL-6 ELISA (ex vivo, BMDM)
	PBS(T)_LPS 24h	IS (T)_LPS 24h				PBS(T)_LPS 24h	IS (T)_LPS 24h
	402.877	434.815				822.002	1020.53
	404.626	375.288				949.571	911.001
	361.776	345.151				752.136	874.098
	425.848	314.374				936.198	784.804
	511.122	338.584				1125.53	942.139

## Sheet: Fig. 6-sFig. 1E
	Fig. 6-sFig. 1E
	Fig. 6-sFig. 1E
	ALOX5/ACTIN
		PBS group	IS group
	I set	0.923732	1.10894
		1.07792	0.69282
		0.411264	0.957101
		1.14799	0.707153
		0.734527	0.638664
		0.724316	0.870675
		0.662168
	II set	0.318982	0.346137
		0.640386	0.493932
		0.427298	0.558856
		0.699558	0.801225
		0.487908	0.458163
