# Supplementary material for: Uremic toxin indoxyl sulfate induces trained immunity via the AhR-dependent arachidonic acid pathway in end-stage renal disease (ESRD)
Source: eLife. 2024 Jul 9;12:RP87316. doi: 10.7554/eLife.87316 (PMC11233136; doi:10.7554/eLife.87316)
Supplement: Figure 6—source data 1. [file elife-87316-fig6-data1.xlsx]

## Sheet: Fig. 6B-C
	Fig. 6B, TNF-α ELISA					Fig. 6B, IL-6 ELISA
		HCs_7d_LPS	ESRDs_7d_LPS				HCs_7d_LPS	ESRDs_7d_LPS
	HC2022053	3212.83				HC2022053	1476.72
	HC2022054	3825.31				HC2022054	1818.02
	HC2022057	3006.41				HC2022057	1297.4
	HC2022058	3114.67				HC2022058	2201.73
	HC2022059	1587.53				HC2022059	1258.25
	HC2022060	4262.67				HC2022060	2460.26
	HC2022061	3249.28				HC2022061	761.577
	HC2022062	3646.97				HC2022062	657.548
	HC2022064	2648.39				HC2022064	697.131
	HC2022065	3118.8				HC2022065	1540.17
	HC2022066	832.238				HC2022066	494.901
	ES(Y)2022001		3590.37			ES(Y)2022001		1936.82
	ES(Y)2022002		5045			ES(Y)2022002		2860.67
	ES(Y)2022003		3206.14			ES(Y)2022003		2069.32
	ES(Y)2022004		3315.42			ES(Y)2022004		714.269
	ES(Y)2022005		8093.94			ES(Y)2022005		1833.26
	ES(Y)2022006		2102.2			ES(Y)2022006		1101.96
	ES(Y)2022007		3856.85			ES(Y)2022007		2728.04
	ES(Y)2022008		6592.95			ES(Y)2022008		2683.7
	ES(Y)2022009		5494.97			ES(Y)2022009		4296.57
	ES(Y)2022010		4191.73			ES(Y)2022010		1526.74
	Fig. 6C, IL-1β mRNA						Fig. 6C, MCP-1 mRNA
		HCs_7d	HCs_7d_LPS 24h	ESRDs_7d	ESRDs_7d_LPS 24h			HCs_7d	HCs_7d_LPS 24h	ESRDs_7d	ESRDs_7d_LPS 24h
	HC2022053	-9.3076	-2.27563				HC2022053	-6.97706	-2.89757
	HC2022054	-10.3215	-3.77481				HC2022054	-8.46889	-3.07642
	HC2022057	-9.46385	-2.28458				HC2022057	-8.95376	-4.29205
	HC2022058	-10.5039	-2.74772				HC2022058	-8.59519	-5.35764
	HC2022059	-8.73825	-2.77994				HC2022059	-7.8631	-2.7574
	HC2022060	-9.28445	-2.71548				HC2022060	-6.44806	-3.69624
	HC2022061	-8.33507	-2.88019				HC2022061	-8.06397	-4.85516
	HC2022062	-9.30716	-3.34663				HC2022062	-8.48881	-3.39167
	HC2022064	-11.6132	-3.54608				HC2022064	-5.18898	-3.68584
	HC2022065	-10.0678	-2.34251				HC2022065	-7.36592	-2.24209
	HC2022066	-10.5749	-3.14263				HC2022066	-4.18803	-3.08728
	ES(Y)2022001			-11.707	-2.39126		ES(Y)2022001			-7.06652	-3.42671
	ES(Y)2022002			-9.17142	-0.7716		ES(Y)2022002			-7.90727	-1.91665
	ES(Y)2022003			-9.2757	-1.81628		ES(Y)2022003			-7.82241	-3.1175
	ES(Y)2022004			-9.60157	-0.98335		ES(Y)2022004			-6.88537	-2.68876
	ES(Y)2022005			-10.2926	-1.7756		ES(Y)2022005			-7.48652	-5.3568
	ES(Y)2022006			-8.50274	-3.03885		ES(Y)2022006			-6.73946	-3.18137
	ES(Y)2022007			-11.4795	-2.70407		ES(Y)2022007			-6.84709	-2.7992
	ES(Y)2022008			-9.68876	-1.39151		ES(Y)2022008			-7.54124	-1.71726
	ES(Y)2022009			-9.55733	-2.33925		ES(Y)2022009			-6.50119	-2.48095
	ES(Y)2022010			-9.32752	-1.61556		ES(Y)2022010			-6.32633	-2.79225

## Sheet: Fig. 6E-F
	Fig. 6E, WB									Fig. 6F, ALOX5/ACTIN				Fig. 6F, ALOX5AP/ACTIN
										HCs_mo	ESRDs_mo			HCs_mo	ESRDs_mo
										0.365911	0.982327			0.703676	0.929959
										0.533868	0.855832			1.05443	0.884897
										0.731689	0.916984			0.52395	1.13793
										0.953203	1.09761			1.1285	0.835935
										0.612553	1.26192			1.31815	1.21763
										0.784122	0.946883			1.18503	0.856521
											1.04393				1.00823
											0.895713				0.685968
											1.32432				1.10468
											1.04408				1.06253

## Sheet: Fig. 6G-H 
	Figure 6G, WB								Fig. 6H ALOX5/ACTIN				Fig. 6H, ALOX5AP/ACTIN
									HCs_HMDM	ESRDs_HMDM			HCs_HMDM	ESRDs_HMDM
									0.368709	1.09333			1.04889	1.14975
									0.92276	0.979738			1.29558	1.207
									0.62389	0.956753			1.03728	1.00037
									0.568901	0.827084			1.35811	1.02794
									0.566555	0.785918			1.12752	1.21978
										0.711579				1.35882
										1.18645				0.969446
										0.675484				1.18657

## Sheet: FIg. 6J-K
	Fig. 6J, mTNF-α ELISA (Mouse serum)				Fig. 6J, mIL-6 ELISA (Mouse serum)
	LPS 75 min	IS(T)+LPS 75 min			LPS 75 min	IS(T)+LPS 75 min
	2022.09	3456.64			17406.3	18924.3
	3002.73	3669.87			18457	18482.9
	2638.32	2951.42			15681	16026.7
	1419.21	2457.93			15656.3	15656.3
	2022.09	6579.59			15288.5	15264.1
	5313.29	2257.01			13018.2	9575.89
	3948.31	2936.11			12948.1	11320.3
	1764.27	4708.18			10916.6	13747.8
	3239.07	5940.42			15166.5	17993.4
	1888.95	5444.24			9231.18	16925.9
	4273.7	4759.91			14392.2	17558.9
	5506.83	6511.17			17814.1	20642.2
	2835.09	5416.54			13369.9	23406.1
	4714.63	3681.27			15977.2	15239.7
	3790.44	3132.92			15020.4	15142.1
	2905.62				12645.8
	Fig. 6K, mTNF-α ELISA (ex vivo, SPs)				Fig. 6K, mIL-6 ELISA (ex vivo, SPs)
	PBS(T)_LPS 24h	IS (T)_LPS 24h			PBS(T)_LPS 24h	IS (T)_LPS 24h
	116.157	111.82			99.3041	128.098
	83.6711	137.037			80.2891	216.964
	74.5083	113.434			84.7444	164.569
	95.5738	113.434			98.605	132.444
	74.1116	107.594			54.0664	121.618
	179.637	395.862			179.637	395.862
	207.158	274.224			207.158	274.224
	221.544	273.37			221.544	273.37
	80.4722	237.507			80.4722	237.507
	133.03	189.684			133.03	189.684
	90.1658	144.096			90.1658	144.096
		390.435				390.435
		158.345				158.345

## Sheet: Fig. 6L-M
	Fig. 6L, WB													Fig. 6M, ALOX5/ACTIN
														PBS group	IS group
														0.775837	0.846372
														0.527091	0.750387
														0.528195	0.957042
														0.391442	0.471696
														0.802566	1.0106
														0.539095	1.16065
														0.614336	0.937181
														0.632127	0.731101
														0.572564	0.699834
														0.893615	0.712185

## Sheet: Fig. 6N
	Fig. 6N, mTNF-α ELISA (ex vivo, SPs)						Fig. 6N, mIL-6 ELISA (ex vivo, SPs)
	PBS(T)_LPS 4h	PBS(T)_LPS+ZLT	IS(T)_LPS 4h	IS(T)_LPS+ZLT			PBS(T)_LPS 4h	PBS(T)_LPS+ZLT	IS(T)_LPS 4h	IS(T)_LPS+ZLT
	59.0909	51.0473	53.4064	46.4678			86.1423	82.0925	111.865	99.2849
	41.359	37.864	64.1637	59.9235			72.1367	66.8681	193.197	156.065
	36.8406	34.8284	50.6586	46.0946			65.0115	65.3193	126.091	106.827
	35.8287	33.5126	53.8041	44.9825			90.8278	86.4538	112.179	104.308
	30.3132	27.8461	47.9738	42.793			50.8167	76.8018	117.862	102.738
